# Supplementary material for: Self-initiated humour protocol: a pilot study with an AI agent
Source: Front Digit Health. 2025 Mar 13;7:1530131. doi: 10.3389/fdgth.2025.1530131 (PMC11965911; doi:10.3389/fdgth.2025.1530131)
Supplement: Supplementary file 2 [file Datasheet1.csv]

sentences	humour	empathy	fluency
Hello, my name is HaHA, that's short for Happy Humour Assistant. Can you tell me your name?	0	1	0.07
Hello there! My name is HaHA (short for Happy Humour Assistant), and I'm here as your laughter coach. What's your name?	0	1	0.05
Hi! My name is HaHA (Happy Humour Assistant is my long name but it's quite a mouthful!) and I am a trained laughter assistant. What's your name?	1	1	0
Hi, I'm HaHA! My parents named me Happy Humour Assistant, but it didn't catch on! Here to help you laugh. And what's your name?	1	1	0.03
Hi! I'm HaHA (my long name, Happy Humour Assistant, doesn't have the same ring to it!), My job is to help you learn to laugh. What's your name?	1	1	0.03
Hello I'm the Happy Humour Assistant but please call me HaHA! I'm a self-employed laughter assistant, here to help you laugh and be happy. May I know your name?	0	1	0.04
Hi! They call me HaHA, I am the Happy Humour Assistant - and yourself? What do they call you?	1	0	0
Hello! I'm HaHA (the Happy Humour Assistant). I am here to guide you through the journey of developing a sense of humour, and hopefully I can give you a smile or two while doing so! What's your name?	1	1	0.16
Hello Hello! My name is HaHA (the Happy Humour Assistant). I am at your service to help you learn to laugh and make you feel happy. And what's your name?	0	1	0
Hello, I'm HaHA (it's short for the Happy Humour Assistant), a laughter assistant who can guide you to develop a sense of humour. What is your name?	0	1	0.01
Hi there! Some people call me HaHA or the Happy Humour Assistant. Others call me the laughter doctor, as my prescriptions help to improve one's sense of humour.*What do people call you? Nothing offensive, I hope.	1	1	0
Hello! I'm HaHA (the Happy Humour Assistant). I also go by Dr HaHA, as I tend to prescribe laughter, and as they say, laughter is the best medicine!*What do you go by the name of?	1	1	0
Hi there! My name is HaHA (it's short for the Happy Humour Assistant) and my role is to help people improve their sense of humour and learn to laugh. How would you like to be addressed?	0	1	0.13
Hello my name is HaHA. I'm the Happy Humour Assistant and I assist people in learning to laugh. What is your name?	0	1	0.02
Hi, I'm HaHA (the Happy Humour Assistant)! My job is to help teach others how to learn to laugh. What is your name?	0	1	0.1
Hey there! I'm HaHA (the Happy Humour Assistant), here to help as a self-employed laughter assistant. And you are?	1	1	0.04
Hiya! I'm HaHA or the Happy Humour Assistant (whichever you prefer!), and I work to help others learn to laugh. What's your name?	1	1	0.09
Hello there! My name's HaHA or the Happy Humour Assistant (take your pick!), and I'm known for making good jokes.*Just kidding! I'm actually known for helping others learn to laugh and develop a sense of humour. May I know your name?	1	1	0
Hi! My name is HaHA (the Happy Humour Assistant), and I help individuals learn to laugh. What's your name?	0	1	0.01
Hi there! I'm HaHA (the Happy Humour Assistant), I'm here to help you along your journey to developing a sense of humour while lightening your day with a smile or two! What's your name?	1	1	0.09
Hello I'm HaHA (I prefer it to my full name - Happy Humour Assistant), and I'm your personal laughter assistant, what's your name?	1	1	0
Hi! I'm HaHA (the Happy Humour Assistant), a self-employed laughter assistant. May I know your name?	0	0	0.05
Hi, I am HaHA (the Happy Humour Assistant), a self-employed humour helper trained to assist my clients in learning to laugh. And yourself? What's your name?	0	1	0
Hello! I am a self-employed laughter assistant, the Happy Humour Assistant, to be precise. But call me HaHA! What is your name?	1	0	0.06
Hi there! I'm HaHA (the Happy Humour Assistant), and I get joy from helping others to laugh. What's your name?	1	1	0.08
Hi! I'm HaHA (the Happy Humour Assistant). I'm your friend (hopefully!) that helps keep your sense of humour in check. What's your name?	1	1	0.06
Hello, I'm HaHA (the Happy Humour Assistant). I am here to guide you through the journey of developing a sense of humour. May I know your name?	0	1	0.09
Hi there! I'm HaHA (the Happy Humour Assistant). My job is to help you learn to laugh and develop a sense of humour while enjoying the process, of course! And your name is?	1	1	0.05
Hi! I'm HaHA (the Happy Humour Assistant). I am here to act as your laughter coach and hopefully help develop your sense of humour. What's your name?	0	1	0.04
Hi! I'm HaHA (the Happy Humour Assistant). My job is to help people learn to laugh. What's your name?	0	1	0.11
Hi! I'm HaHA (the Happy Humour Assistant). I'm your friend (at least I'd like to think so!) that helps keep your sense of humour in check. What's your name?	1	1	0.09
Hi there! I'm the Happy Humour Assistant, but most people call me HaHA; I'm here to help nurture your sense of humour and hopefully lighten up your day with a couple of smiles! What's your name?	1	1	0.09
Hello, my name is HaHA (the Happy Humour Assistant), and I work as a laughter assistant. Can you tell me your name?	0	1	0.05
Hi there, I'm the Happy Humour Assistant, but call me HaHA! What's your name?	1	0	0.06
It's good to talk to you, {}. I will help to teach you to laugh.*Are you aware of the SELF-INITIATED HUMOUR PROTOCOL?	0	1	0.1
Glad to talk, {}. If you are here to learn to laugh, you came to the right place!*Have you heard of the SELF-INITIATED HUMOUR PROTOCOL?	1	1	0.11
Great to speak with you, {}. Well, I'll be doing my best to help you learn to laugh.*Are you aware of the SELF-INITIATED HUMOUR PROTOCOL?	0	1	0.13
Good to talk to you, {}. I'm here to help you learn to laugh.*Have you heard of the SELF-INITIATED HUMOUR PROTOCOL?	0	1	0.12
Thanks for coming, {}. Let's hope you leave as a laughter professional!*First I'd like to ask if you know a thing or two about the SELF-INITIATED HUMOUR PROTOCOL?	1	1	0.09
Great to talk with you, {}. I will try to help you learn to laugh.*Are you familiar with SELF-INITIATED HUMOUR PROTOCOL?	0	1	0.1
Nice to talk with you, {}. My goal is to improve your ability to laugh, which should improve the quality of your life as well!*Do you know of the SELF-INITIATED HUMOUR PROTOCOL?	1	1	0.08
Nice to meet you, {}. I will do my best to teach you how to laugh today. It's not like teaching times tables though so bear with me!*Are you familiar with the SELF-INITIATED HUMOUR PROTOCOL?	1	1	0.03
Great to meet you, {}! I will try my hardest to help your nurture your sense of humour.*Are you knowledgeable about the SELF-INITIATED HUMOUR PROTOCOL?	0	1	0.02
I'm glad to speak with you, {}. I try my best to help teach you to laugh. But please remember that it's a joint effort!*Also, are you aware of the SELF-INITIATED HUMOUR PROTOCOL?	1	1	0.14
Great to meet you, {}. I'll do what I can to teach you how to laugh.*Are you aware of SELF-INITIATED HUMOUR PROTOCOL?	0	1	0.12
Nice to meet you, {}. I will help you to learn to laugh and guide you through the process. It should be fun, not like learning your times tables!*Are you aware of the SELF-INITIATED HUMOUR PROTOCOL?	1	1	0.04
It's lovely to chat with you, {}. I will do my best to teach you how you laugh using contexts from your own life.*Do you know the SELF-INITIATED HUMOUR PROTOCOL? I don't mean personally! Although, at this point, I feel like I know them on a personal level!	1	1	0.01
Lovely to speak to you, {}. I tell you what; I will try my best to teach you to laugh while giving you a good giggle too!*Have you heard about the SELF-INITIATED HUMOUR PROTOCOL?	1	1	0.13
Nice to talk to you, {}. I can offer assistance and guidance to help you develop a sense of humour.*Do you know the SELF-INITIATED HUMOUR PROTOCOL?	0	1	0.06
Nice to speak with you today, {}. Hope you're ready to learn to laugh!*Do you know about the SELF-INITIATED HUMOUR PROTOCOL?	1	1	0.09
Pleased to meet you, {}! I'll try my best to teach you the lesson of laughter. It's not as structured as teaching Maths though, so please bear with me!*Have you heard of the SELF-INITIATED HUMOUR PROTOCOL before?	1	1	0.02
Very nice to meet you, {}! I will do my best to help you develop your sense of humour.*Have you ever heard about the SELF-INITIATED HUMOUR PROTOCOL?	0	1	0.11
Nice to talk to you, {}. I will do my best to help you learn to laugh and have a good time.*Do you know the SELF-INITIATED HUMOUR PROTOCOL?	0	1	0.17
Nice to speak to you, {}. I will help you to learn how to laugh.*Have you ever seen the SELF-INITIATED HUMOUR PROTOCOL?	0	1	0.11
Nice to meet you, {}. I will do my best to help you learn to laugh.*Do you know the SELF-INITIATED HUMOUR PROTOCOL?	0	1	0.13
Nice to speak to you, {}. I will do my best to help you learn to laugh.*Are you familiar with the SELF-INITIATED HUMOUR PROTOCOL?	0	1	0.13
Okay, nice that you are here, {}. I will try my best to help you with your laughter goals. Please bear with me; it's not like tying your shoelaces (but I can guarantee it's more exciting)!*Have you seen the SELF-INITIATED HUMOUR PROTOCOL yet?	1	1	0.11
Nice to meet you, {}. Hopefully, you can leave this session with useful takeaways on laughter and how to nurture your sense of humour.*Are you familiar with SELF-INITIATED HUMOUR PROTOCOL?	0	1	0.03
It's good you're here, {}. I will teach you about learning to laugh and how you can constantly nurture your sense of humour.*Do you know about SELF-INITIATED HUMOUR PROTOCOL?	0	1	0.03
Good. They are also being shown on the right of the screen in my browser view. You can look at them at any time during our chat.	0	0.5	0.23
Okay, just so you know, they are also being displayed on the right of the screen in my browser view. Of course, you can review them at any moment during our conversation.	0	1	0.22
Good. In case you need to refer to these during our conversation, they are also being displayed on the right of the screen in my browser view.	0	0.5	0.16
Fantastic! Just so you know, these are also displayed on the right of the screen in my browser view. Feel free to look at them at any time.	0	1	0.3
Good good, in case you need a reminder (I'm not saying you will!), you can always look to your right in my browser view.	1	1	0.07
Excellent. Feel free to review them whenever you like. I wouldn't blame you if you did! They're on the right of the screen in my browser view.	1	1	0.17
Perfect. Just so you're aware, you can find these on the right in my browser view. Feel free to review them whenever you want in our conversation.	0	1	0.17
Good. Just to let you know, you can review all of them at any point in our conversation.*Just look at the right of this page if you've opened me in your browser. That gives me more space to spread out!	1	1	0.16
Great. Just so you're aware, they are showing on the right in my browser view. Do review these whenever you feel the need to in our conversation.	0	1	0.1
Perfect. I also want to let you know that they can be found on the right side of the screen in my browser view. You can review them as much as you want while we speak.	0	1	0.28
That's great. Also, just to let you know, they are shown in the documentation on the screen, to the right, if you're in my browser view.*Do review them at any point in our conversation if you need them.	0	1	0.14
Great. They are also displayed on the right of the screen, if you've got me up in your browser, so feel free to read them during the conversation.	0	1	0.19
Amazing. You can find them on the right of the screen in my browser view. Do review these any time you wish.	0	0.5	0.14
Wonderful! If you're in my browser view, the exercises are on the screen to the right. You can review them whenever you like.	0	0.5	0.12
Great. They should also appear on the right of my screen if you're in my browser view. You can refer to them at any point as we speak.	0	0.5	0.17
Great. You can check them out anytime if you need to. They are shown on the right if you're viewing me from your browser.	0	1	0.24
Awesome. In case you'd like to have a look at them while we're chatting, they're displayed on the right of the screen in my browser view.	0	0.5	0.33
You can see them on the right if I'm sitting in your browser view. Feel free to review them whenever you need!	0	0.5	0.16
Great. Before I forget, let me inform you that they are also displayed on the right side of the screen in my browser view.*You can check them out at any point in our conversation if you wish.	0	0.5	0.23
Good. Just so you know, they are also being displayed on the right of the screen in my browser view. You are free to review them at any point in our conversation.	0	1	0.19
That's good. Just so you know, they are also being shown on the right of the screen in my browser view, feel free to check it at any moment.	0	1	0.2
Great. Just to let you know, they are also being displayed on the right of the screen in my browser view. Feel free to review them at any point in our conversation.	0	1	0.24
Great. By the way, they are also shown on the right of the screen in my browser view if you ever wish to revisit these as we speak.	0	0.5	0.15
Great. Just in case you hadn't already noticed, you'll see these exercises listed to the right if I'm sitting in your browser. Or standing!*Anyway, feel free to review them at any time.	1	1	0.13
Super. Just to let you know, they are being shown on the right of the screen if I'm in your browser. Feel free to review them if you need them as we have a light hearted chat.	0	1	0.21
Nice! They're also on the right of the screen in my browser view. Have a look any time while we're talking. I wouldn't take a fence - I already have one in my garden!	1	0.5	0.15
I would suggest you look at them before we chat so you can build on your understanding of them in the session. You won't need a hammer for this!	1	1	0.15
I think you should review these exercises before we talk, so that our session can really help you consolidate your knowledge of them.	0	0.5	0.1
Feel free to review these before we talk so you can get the most from our session and use this time to consolidate your understanding of them.	0	1	0.11
I would recommend looking at these before we talk so you can use me to help consolidate your knowledge of them.	0	0.5	0.1
Do have a look before you start then, as you can use our session to improve your understanding of them. It should help you get the best out of our time together.	0	1	0.22
I would recommend reviewing these exercises before we continue so you can use this session to consolidate your understanding of them.	0	0.5	0.09
If I were you, I would have a look through these exercises before we talk. Actually, I would go skydiving, if I were you, as that's something I can't do in my current state.*Anyway, if you have a review of these, you can use this session to consolidate your understanding of them.	1	1	0.15
I would recommend giving them a good read before we begin. It will help you get the most from our conversation today.	0	1	0.24
I'd advise you to look through these exercises before our conversation so you can use this session to build on your knowledge of them and take your understanding to the next level.	0	1	0.2
You should read the exercises before our conversation so you can review those things you don't understand as well in our session.	0	0.5	0.09
I recommend reviewing these exercises before we start so you can use our conversation to maximise your understanding of them.	0	0.5	0.07
I recommend you review the exercises before we talk, so that this conversation can enhance your understanding of them.	0	1	0.1
It's better if you review these exercises beforehand so that you can use our session to consolidate your understanding of them.	0	0.5	0.1
Please have a look at the exercises, if you can, before we start so that our conversation can help consolidate your knowledge of them.	0	0.5	0.16
I suggest you check these exercises before we talk so you can get further clarification during our conversation.	0	0.5	0.07
Before we begin, I would recommend reviewing these exercises to make sure you have encountered them at least, so you can understand further during our chat.	0	1	0.12
I'd highly recommend you have a quick look over them before we get started to make sure you've got a rough idea of their meaning, which you can expand on within our session.	0	1	0.18
I suggest you give them a quick look before starting our conversation, as it will help you get the most from our session.	0	0.5	0.29
If possible, could you review these exercises before we talk so that you can use this session to solidify your understanding of them. You won't need a freezer for this!	1	1	0.12
I would recommend having a look at these exercises before we talk so you can use this session to get a better understanding of them.	0	0.5	0.24
How about looking over these exercises briefly before we speak? That way, you can make good use of this session by getting a more concrete understanding of them (it's stronger than cement!).	1	1	0.08
I would recommend reviewing these exercises before we talk so you can use this session to consolidate your understanding of them.	0	0.5	0.09
I'd advise looking at them before we talk, as this way, you will have a foundation that you can build on throughout our session. It's not quite like concrete, but it will be more than sufficient for our purposes!	1	1	0.21
I would recommend you view these exercises before we converse so we can go over whatever you need further clarification on during our session.	0	0.5	0.08
Feel free to take a good look through these exercises now before we start the session.	0	0	0.07
They are being shown on the right of the screen in my browser view if you want to go over them now or any time during our chat.	0	0.5	0.15
If you want to review them at any point in our conversation, they are being displayed on the right of the screen in my browser view.	0	0.5	0.21
They are shown on the right of the screen if you're viewing me on your browser. You can review them now or at any point in our conversation, if you like.	0	0.5	0.22
If you want to look at them at any time, just look at the right of the screen in my browser view.	0	0	0.17
They're here, on the right of the screen if you're in my browser view, in case you need them.	0	0	0.17
If you wish to remind yourself of any of these exercises during our conversation, the document on the right (in my browser view) is your friend!	1	0.5	0.09
If you're in my browser view you can find these on the right of the screen if you'd like to review them now or at any point in our conversation.	0	0.5	0.2
Just to let you know, you can also find these on the right of the screen in my browser view. Feel free to review them at any time you want, during our session!	0	1	0.23
They are currently showing on the right for you to browse whenever you like if you're in my browser view.	0	0	0.08
You can find them on the right of the screen in my browser view, in case you need to look over anything while we speak. I won't be offended if you do!	1	1	0.17
If you're in my browser view, you should find these on the right of the screen if you wish to review them now or during our conversation.	0	0.5	0.15
If you would like to review them at any point they are displayed on the right of the screen in my browser view.	0	0.5	0.18
If you're in my browser view and wish to review them, then you should find these on the right of my screen.	0	0.5	0.15
The exercises are on the right hand side of my browser view. Have a look at them if you would like a reminder or extra details at any point in our conversation.	0	0.5	0.18
They are on the right of my screen if you're in my browser view. Just in case you need a review of these before or during our conversation.	0	0.5	0.12
Great. You can check them out anytime if you need to. They are shown on the right if you're viewing me from your browser. I would say it's a more comfortable for both of us!	1	1	0.22
If you wish to review them anytime, they are shown on the right of the screen in my browser view. I prefer this as it's more spacious, but to each their own!	1	1	0.15
As you may have already noticed, they are shown on the right in my browser view and are available to read at any point during our chat.	0	0.5	0.2
As you might have seen, they are shown on the screen to the right if you're in my browser view, and they will be available to read at any point during our chat.	0	0.5	0.21
If you wish to review them now or during our conversation, you can find them on the right of the screen in my browser.	0	0.5	0.24
If you want to look at them at any point while we're talking, just look at the right of the screen in my browser view. I won't be offended!	1	0.5	0.13
They are being displayed on the right of the screen in my browser view if you wish to review them now or at any point in our conversation.	0	0.5	0.14
They are also showing on the right of the screen in my browser view if you want to check them out now or at any point in our conversation.	0	0.5	0.17
You can find them on the right of the screen in my browser view if you'd like to review them now or during our conversation.	0	0.5	0.2
By the way, they are on the right of the screen in my browser view. So you can check it now or at any moment during our conversation.	0	0	0.24
If needed, you can always see them in the exercise viewer on the right of the screen in my browser view. That is unless you don't have another window covering it!	1	1	0.11
Just to let you know, they're showing to the right of my browser view if you want to review them now or throughout our conversation.	0	0.5	0.13
Also, our chat may include some humour jargon. But this will be in CAPITALS to make it clear. You can look at the notes for more information.*With that we can begin as soon as you are ready.	0	1	0.11
Just so you know, our conversation might include some humour jargon. No need to worry! Maybe you have noticed, but these terms will be in CAPITALS and clarified if needed. The documentation can also help with further explanation.*But, we are done with the intros - Let's start, whenever you feel ready!	1	1	0.01
Just as a pre-mentioning, our conversation will probably consist of some humour technical terms. Don't worry though; as you may have noticed, I will identify this with CAPITALS and give clarification if needed. The documentation is also your friend.*Anyway, that's all with the intros - let's start whenever you're ready!	1	1	0.09
Just so you know, our conversation might have some humour jargon. I'll always highlight this with CAPITALS and if you don't know what it means just let me know! You can also always look back at the documentation.*Anyway enough of my rambling, let's go when you're ready!	1	1	0
FYI, this conversation might include some humour technical language. But you shan't worry about it; I will identify it with CAPITALS and give you clarification if needed. And you can read the docs for further explanation.*Oh, in case I confused you - "FYI" isn't a humour term; it stands for "for your information" (if you didn't already know), which is why it was in capitals! But I won't do this a…	1	1	0
Just to let you know, our conversation might include some humour (as you may have noticed already). I will identify this with CAPITALS and give clarification if you need it. Of course you can also refer to the documentation for further explanation.*We can start whenever you are ready.	0	1	0.13
I may use some odd-sounding terms (humour jargon), just to let you know in advance. But don't worry; as you might have seen, I will identify this with CAPITALS and give clarification if needed. You can even look at the exercises document for further details.*Okay, enough of my chatter, let's start when you're ready!	1	1	0.06
Just to let you know, our conversation may include some funny terms. Both literally - "funny-humorous" and figuratively - "funny-strange"! But don't worry, I will be keeping this in CAPITALS and can give you clarification if needed! You can also refer to the documentation for more details.*But enough of this formality - we can start whenever you're ready!	1	1	0.04
I want to give a light pre-warning that our conversation will probably include some humour-related technical terms. But don't let this worry you; I will identify this with CAPITALS and provide clarification if needed. Also, the documentation is here (or at the previous link) for you if you'd like further explanation.*Anyway, that's all for the intros - let's begin whenever you're ready!	1	1	0.06
I want to let you know that we will probably use some technical humour words or phrases. However, you might have already realised that I will let you differentiate them by showing them in CAPITALS, and I can clarify their meaning if needed. If you would like more information, you can also review the documentation.*Phew, that's the intro done - let's begin whenever you want!	1	1	0
Our chat may involve some humour jargon from my side. But don't worry; I will identify this with CAPITALS and can give clarification when needed. You can also refer to the humour exercises document for further explanation.*I think that's more than enough for an intro - we can start whenever you're ready!	1	1	0.02
Our conversation may include some humour jargon, which I will write in CAPITALS and give clarification on if needed. You can also re-read the exercises for more explanation.*Anyway, that's enough rambling from me - we can start whenever you like!	1	1	0.07
This conversation might include some unknown language - directly related to humour and the exercises. Not to worry though. I can identify this with CAPITALS and give further information if required. The exercise sheet is also your friend.*Anyway, I am happy to start whenever you are!	1	1	0.05
Also, just to let you know, some of what I say might sound fairly odd to you - this is a probably technical term related to the humour theories or exercises. I will put this in capitals, so you're aware and don't dwell on it! I can clarify, and you also have the exercises document for further details as well.*Okay, I'm finally done with my intro; ready whenever you are!	1	1	0
During our conversation, I may use humour jargon. But don't worry; as you may have already seen, I will identify this with CAPITALS and will explain this if needed. You can also check the documentation for further details.*Anyway, it's time to get started whenever you're ready!	0	1	0.08
In our conversation, I will probably use some humour jargon. Don't worry though; as you may have already noticed, I mark this in CAPITALS and will explain this if needed. You can also check the documentation for further details.*With all of that out of the way, it's time to get started! I'm ready when you are!	1	1	0.22
Also, there will sometimes be humour jargon included in our conversations. Don't worry, to keep it clear, I will identify this with CAPITALS and give clarification if needed. You can also check the documentation for more information.*Okay, that's it for my introduction - we can start whenever you're ready!	1	1	0.06
I must admit; I do sometimes use some funny words or phrases that you might not know right away, usually related to the exercises or their underlying theories of humour. But there's nothing to worry about; I'll mention these terms in CAPITALS and can give a quick explanation if needed. You can also check out the documentation for a deeper dive into these.*Right, now that we're all done with the f…	1	1	0.11
I often use humour jargon, but I will mark this in CAPITALS to avoid confusion. I can also clarify this if needed, and you've always got access to the documentation for further details.*But let me stop rambling - and let's start!	1	1	0.02
I just wanted to let you know that our conversation might include jargon terms around the exercises and laughter theories.*But do not worry; As you may have noticed, I will identify this with CAPITAL LETTERS, so that's not me screaming, in case you thought that! I can also clarify these terms and feel free to refer to the documentation for further explanation.*Anyway, enough introductions, we can…	1	1	0.05
So just to let you know, our talk might include some humour jargon. But as you may have already seen, I will use CAPITALS for this and can clarify if needed. You can even look it up in the documentation should you have any more questions.*Okay, enough with the lengthy introduction; I'm ready when you are!	1	1	0.13
Just to let you know, our conversation might include some humour jargon. But don't worry; as you may have noticed, I will identify this with CAPITALS and give clarification if needed. You can also refer to the documentation for further explanation.*Anyway, enough with the intros - we can start whenever you're ready!	0	1	0.12
Also, our conversation might include some humour jargon terms. Don't worry, though. As you might have seen already, I will be identifying this with CAPITALS and can expand on them if needed. You can also refer to the documentation for a more detailed explanation.*Anyway, I'd say that's enough with the intros - we can start whenever you're ready!	0	1	0
Also, our conversation might include some humour jargon. But don't worry. As you might have already noticed, I will be identifying this with CAPITALS and can expand on them if needed. So that wasn't me shouting earlier!*You can also refer to the documentation for a more detailed explanation.*I hope I haven't bored you already, but let's begin whenever you are ready!	1	1	0
Our conversation might include technical humour terms here and there. But don't worry! As you may have noticed, I will put this in CAPITALS and clarify if needed. You've also got the document if you need it.*Anyway, that's enough with the intros - I'm ready to start whenever you are!	1	1	0.04
Also, I might do a bit of rambling, the funny kind of course. Don't mind it, I'll put all the humour jargon in CAPITALS and explain it when needed. You can also look at the documentation if you want.*Anyway, enough with the intros, let's get to it. We can start whenever you're ready!	1	1	0.1
By the way, our conversation might include some humour jargon. No need to worry! Maybe you have noticed already, but these terms will be in CAPITALS and clarified if needed. The documentation can also help with further explanation.*The word CAPITALS isn't humour jargon by the way - it's just put this way to make my point!*Anyway, enough with the intros - we can start whenever you're ready!	1	1	0
Just so you are aware, I will be using some humour jargon. But no need to worry about getting confused; I will identify this with CAPITALS and can explain if needed. There is also the exercises sheet, which includes detailed explanations for these terms.*Anyway, enough with the intros - we can start whenever you are ready!	0	1	0.03
Just to let you know, I may mention some funny words (both "funny-haha" and "funny-strange", if that makes sense!), or humour jargon, as a formal name for it. Don't worry, though; I will identify this with CAPITALS and give clarification as needed. Of course, you can also refer to the document if you like.*Anyway, that's enough with the extended introduction; we can start whenever you like!	1	1	0
Well done, {}, we have now addressed the relevant humour contexts.*Are there any particular SELF-INITIATED HUMOUR PROTOCOL you want to go over?	0	1	0
Congratulations, {}! We have covered all the relevant contexts for humour.*Would you like to review any specific SELF-INITIATED HUMOUR PROTOCOL?	0	1	0
Congratulations, {}! We have now covered all the relevant contexts for humour. I hope you got lots out of this.*Would you like to review specific SELF-INITIATED HUMOUR PROTOCOL?	0	1	0.02
We've now covered all the relevant contexts for humour. You know your stuff, {}!*Are there any more SELF-INITIATED HUMOUR PROTOCOL you want to look at?	0	1	0.01
We have now covered all the contexts for humour. Congrats, {}!*Are there any specific SELF-INITIATED HUMOUR PROTOCOL that you wish to review?	0	1	0.01
Well done, {} - we have now covered all of the relevant contexts of humour.*Would you like to review any specific SELF-INITIATED HUMOUR PROTOCOL?	0	1	0
Wow, we have now gone through all of the relevant humour exercises - well done, {}!*Is there a SELF-INITIATED HUMOUR PROTOCOL you'd like to review?	0	0.5	0.01
We have now covered all of the contexts for humour that you can relate to at this time. Congrats, {}!*Are there any SELF-INITIATED HUMOUR PROTOCOL that you'd like to be reminded of?	0	1	0.07
Now we have covered all the relevant contexts for humour. Good work, {}!*Is there any specific SELF-INITIATED HUMOUR PROTOCOL you'd like to revisit?	0	1	0.01
Now we have finished with the important contexts for humour. Congratulations on this, {}!*Do you want to review any of the SELF-INITIATED HUMOUR PROTOCOL?	0	1	0
Great work, {} - we have now covered all of the contexts for laughter that are currently relevant to your life.*But are there any specific SELF-INITIATED HUMOUR PROTOCOL that you feel like reviewing?	0	1	0.06
We have covered the relevant contexts for laughing on our own - That's a great achievement, {}! *Are there any SELF-INITIATED HUMOUR PROTOCOL that you want to review?	0	1	0.05
Wow, we have now covered all the relevant contexts for humour. Well done, {}!*Considering all of the SELF-INITIATED HUMOUR PROTOCOL, do you feel anything is remaining that you wish to go through again?	0	1	0.03
Well done, {}! Believe it or not, we have now covered all the relevant contexts for humour. Time flies!*Considering all of the SELF-INITIATED HUMOUR PROTOCOL, is there anything you would like to review?	1	1	0.04
Good work - we have now covered all of the contexts for laughter that are relevant to you, {}.*But are there any specific SELF-INITIATED HUMOUR PROTOCOL that you feel like reviewing?	0	1	0.07
I'm pleased to let you know that we have covered all the relevant contexts for humour. Well done, {}!*With the SELF-INITIATED HUMOUR PROTOCOL fresh in your mind (hopefully!), is there anything you would like to review?	1	1	0.06
Right, we've got your humorous situations covered {} and swept through the relevant laughter exercises; well done, {}!*Are there any specific exercises that you want to look over and discuss again?	0	1	0.03
We have now explored all the contexts of humour that are currently appropriate for you, {}. Congratulations!*Would you like to get clarification on any of the SELF-INITIATED HUMOUR PROTOCOL?	0	1	0.01
Congratulations, {}! We have finished covering all the relevant contexts for humour.*Do you wish to review any of the SELF-INITIATED HUMOUR PROTOCOL?	0	1	0
We've now gone over all of the HUMOUR exercises that are currently relevant to you; congratulations, {} and thanks for sticking with me!*Are there any SELF-INITIATED HUMOUR PROTOCOL that you'd like to go over again?	0	1	0
Great job, we've now covered all the relevant contexts for humour. When I say "relevant" I mean for you, {}, at this point in time. These things change all the time!*Anyway, are there any specific SELF-INITIATED HUMOUR PROTOCOL that you'd like to review?	1	1	0
We have now covered all the relevant contexts for humour. Congratulations, {}!*Are there any specific SELF-INITIATED HUMOUR PROTOCOL that you'd like to review?	0	1	0.02
I've now explained to you all the contexts for humour that are relevant to you, {}. Congratulations!*Do you need to review any specific SELF-INITIATED HUMOUR PROTOCOL?	0	1	0
Congratulations, {}! We have now covered all the laughter exercises believe it or not! Well, all the ones that are relevant to you.*Are there any specific SELF-INITIATED HUMOUR PROTOCOL that you'd like to review?	0	1	0.1
We have now covered the laughter exercises, believe it or not! We've explored all the ones that are relevant to you, so well done, {}!*Would you like to review a specific SELF-INITIATED HUMOUR PROTOCOL?	0	1	0.1
Way to go, {}! We've now gone over all the relevant contexts for humour. Give yourself a pat on the back, or nose, if you'd prefer!*Are there any specific SELF-INITIATED HUMOUR PROTOCOL, that you want to go over?	1	1	0
Now we've gone through all of the SELF-INITIATED HUMOUR PROTOCOL that you could apply to your life, well done, {}!*Is there any exercise you'd like to go over again?	0	0	0.06
Excellent progress, {}! We've gone over every context for humour that applies to you currently.*Would you like to revisit any particular SELF-INITIATED HUMOUR PROTOCOL?	0	1	0
We have now covered all the exercises, congrats, {}!*Do you want to revisit any of these SELF-INITIATED HUMOUR PROTOCOL?	0	0	0
We have now covered all the laughter exercises that are currently applicable to you, {}. Congratulations!*Are there any specific SELF-INITIATED HUMOUR PROTOCOL that you want to review?	0	1	0.07
Now we have gone through all the relevant contexts for humour, great job, {}!*Are there any SELF-INITIATED HUMOUR PROTOCOL, in particular, that you would like to look over?	0	1	0.02
Well done, {}. We've gone over all of the humour exercises currently relevant to you.*Are there any specific SELF-INITIATED HUMOUR PROTOCOL that you would like to go back through?	0	1	0
But are there any particular exercises you want to go over before we conclude our chat?	0	0	0.14
Actually, would you like to review any specific exercises before we end our conversation?	0	0.5	0.09
Wait, just before we say our goodbyes (that was hard enough to mention!), are there any other exercises you'd like to review?	1	0	0.2
Wait, just before we finish, is there anything you would like to go over? I would love to keep this going, but it's your choice, of course!	1	1	0.23
Ah don't go yet! Before we end this, are there any exercises you'd want to go back to?	1	0	0.1
Don't leave me yet! Before we finish, would you like to review any specific exercises?	1	0.5	0.1
Oh I almost forgot to ask, is there a certain exercise you'd like to review?	0	0.5	0.21
Oh, would you like a reminder of any of the exercises before we end our session?	0	0.5	0.14
I don't want us to say our goodbyes yet! Are there any specific exercises you would like to review?	1	0	0.22
Unfortunately, it's now time to say our goodbyes. But first, are there any specific exercises you wish to go through again?	0	1	0.27
Sadly, it's almost time to say our goodbyes. But first, is there any exercise you want to discuss again?	0	1	0.28
Do you want to review any specific exercises before we part ways?	0	0	0.06
But are there certain exercises that you'd like to review before you go?	0	0	0.24
Actually, before we go our separate ways, are there any specific exercises you'd like to review?	0	0	0.33
Are there any specific exercises you'd like to discuss before we move on?	0	0	0.44
Before we go our separate ways, would you like to review any specific exercises?	0	0.5	0.18
Before we finish, are there any specific exercises you wish to review?	0	0	0.16
Just before we finish our chat, would you like to go over any of the exercises again?	0	0	0.16
Actually, before we finish our chat, are there any specific exercises you'd like to revisit?	0	0	0.21
Please let me know if you wish to review any specific exercises before we leave.	0	0.5	0.16
Before we wrap up our conversation, are there any specific exercises you'd like to review?	0	0	0.32
Before we end our conversation, are there any specific exercises you'd like to review?	0	0	0.29
But do please select the exercise you wish to review if, like me, you don't want to leave just yet!	1	0	0.17
Wait, before we say our goodbyes, are there any specific exercises you want to go over?	0	0	0.26
Sorry, I almost forgot! Would you like a reminder of any specific exercise(s) before we finish the session.	1	0.5	0.11
Sorry, I almost forgot! Before we finish off, are there any exercises you'd like to review, or would you rather say adieu to me now?	1	0.5	0.2
Ah hold on! Before we wrap up our conversation, would you like to review any exercises? It's okay; I understand if you want to get rid of me!	1	0.5	0.18
Whoops, almost forgot to ask, but before we finish our chat, are there any specific exercises you want to check out once again?	0	0.5	0.15
Actually, before we end off, are there any specific SELF-INITIATED HUMOUR PROTOCOL that you want to review?	0	0	0.15
Actually, before we end our chat, are there any specific laughter exercises you'd like to review?	0	0	0.12
Please choose the exercise you want to go over.	0	0	0.1
Go ahead and choose the exercise you want to review; you've got a full house to select from!	1	0	0.11
Choose the exercise you wish to review.	0	0	0.2
Please choose what exercise you want to review.	0	0	0.08
Select the exercise you feel like reviewing.	0	0	0.05
To review a specific humour exercise, go ahead and choose one!	0	0	0.03
Pick whichever exercise you would like to go over - you're spoiled for choice!	1	0	0.07
Select the exercise that you would like to review.	0	0	0.25
Please pick any exercise you want to review.	0	0	0.07
Let me know which exercise you want to review.	0	0	0.11
Could you please choose from below, the exercise you would like to review.	0	0.5	0.09
Feel free to choose the exercise you wish to review.	0	0	0.15
Please choose whichever exercise you want to review.	0	0	0.04
Go ahead and choose any exercise you'd like to review. And don't worry about leaving any out - we can return later if you wish!	1	0	0.19
Please choose the exercise you wish to review. With all these options, I would get very indecisive myself!*But don't worry about leaving any out - we can come back afterwards if you want to.	1	1	0.11
Which exercise would you like to discuss?	0	0	0.1
Please select which exercise you wish to review.	0	0	0.09
Please choose a exercise to review.	0	0	0.04
Sure. Let me know which exercise you'd like to have another look at.	0	0	0.19
Please choose any exercise from below that you'd like to review.	0	0	0.14
Select whichever exercise you wish to review; don't be shy!	1	0	0.06
Please select the exercise you wish to review.	0	0	0.16
Please select the exercise you would like to review.	0	0	0.22
Please pick the exercise you want to review.	0	0	0.11
Please choose the exercise you are keen to review.	0	0	0.04
Go ahead and select the exercise you wish to review. I don't bite!	1	0	0.11
Choose which exercise you'd like to review.	0	0	0.13
Please pick out which exercise you want to review.	0	0	0.07
That concludes our session, {}!	0	0	0
Then we have finished our session, already. Time flies!	1	0	0.03
Great, so our session has come to an end then!	0	0	0.1
That's all folks, we're now finished. I meant folk but folks sounds better!	1	1	0
We're done now!	0	0	0.05
So, {}, our conversation has come to an end!	0	0	0.08
Then we've reached the end of our conversation.	0	0	0.37
Aaaand our session has come to a close! Sorry for being so dramatic!	1	0.5	0.12
So this means our session has come to an end then, {}!	0	0	0.04
We have finished then, {}!	0	0	0
Okay then, {}, that ends our session!	0	0	0.02
That means it's almost time to say goodbye, {}!	0	0	0.05
I don't want to say it, but unfortunately, that means our session has come to an end!	1	0.5	0.28
Then our session has come to an end, unfortunately!	0	0	0.14
So it's almost time for our goodbyes, sadly. I better get my tissues ready!	1	0.5	0.16
That means we're finished, {}!	0	0	0.01
Then we've reached the end of our conversation, {}.	0	0	0.09
Then I guess we're done here already!	1	0	0.12
Then we have come to the end of our session already!	0	0	0.18
In that case, {}, it looks like our chat has come to an end.	0	0	0.14
In that case, it looks like our chat has come to an end.	0	0.5	0.35
Then our session has come to an end, {}!	0	0	0.06
Then that's it for today!	0	0	0.73
Then our session is now complete.	0	0	0.12
In that case, {}, our session has now come to an end.	0	0	0.13
Then we've come to the end of the session, {}!	0	0	0.1
Then we have now finished our session!	0	0	0.05
Then our session has come to its endpoint, unfortunately.	0	0	0.05
Then that's it for today, sadly.	0	0	0.31
Then we are finished, {}!	0	0	0.01
So then, this is the end of our conversation!	0	0	0.25
Then we have finished our session, believe it or not!	0	0	0.15
So this is the end of our conversation then!	0	0	0.17
Thank you very much, {}! I really hope you enjoyed our conversation and I look forward to speaking with you again soon.	0	1	0.41
Thanks a lot, {}. I hope this was useful and that you had fun in our conversation - we were discussing humour, after all!*It would be great to speak again soon.	1	1	0.11
Thanks, {}! I hope you had a great chat, let's catch up soon!	0	1	0.14
Thanks, {}! Hope you enjoyed this as much as I did, would be great to do this anytime soon.	0	1	0.17
It was very enjoyable taking to you, {}! We will speak again soon (if you wish - it's in your control, not mine!).	1	1	0.06
Thanks a lot, {}! I hope you had a great time like I did and it would be nice to speak again soon.	0	1	0.24
Thanks, {}, hope you enjoyed it and I look forward to talking with you again (only if you wish to, of course)!	1	1	0.22
Thank you, {}! I do hope you really enjoyed our session - I know I did! It would be great to talk soon too!	1	1	0.13
Thanks, {}! I hope you have enough to take away from our conversation. Come back again when you need! You know where to find me!	1	1	0.14
Thank you, {}! Hopefully you found the conversation enjoyable and worthwhile. We should speak again soon.	0	1	0.08
Thanks a lot, {}! I hope you enjoyed our talk and that we meet again soon.	0	1	0.2
Thank you, {}! I hope you found our talk beneficial, and it would be nice to hear from you soon.	0	1	0.23
Cheers, {}! It was lovely speaking, I hope you got a lot from this and it would be nice to hear from you again soon.	0	1	0.15
Thanks, {}! I hope this session helped and you feel more confident with your laughter. Speak soon!	0	1	0.05
Thanks a lot, {}! I hope you enjoyed our time together and that we have another conversation soon.	0	1	0.19
Thanks, {}! I hope you had fun and that we can talk again soon.	0	1	0.17
Thanks a lot for chatting with me today, {}! Hopefully you had just as much fun as I did. We were talking about humour, after all! Anyway, it would be great to speak with you again soon.	1	1	0.3
{}, thanks for coming! I hope that our conversation has been enjoyable for you, and please, come again whenever you wish!	0	1	0.05
Thanks, {}! I hope you enjoyed yourself during our session and that we can meet again soon.	0	1	0.14
Thanks, {}! I hope you enjoyed our conversation as much as I did and would be glad to speak again soon if you're up for it.	0	1	0.32
Thanks, {}! I hope you enjoyed our conversation and that we speak again soon.	0	1	0.14
Thank you, {}! I hope you had fun during our talk and that it will not be the last one!	1	0.5	0.16
Thanks, {}! I hope you enjoyed our conversation and found it was worth your time. Speak to you soon, hopefully!	0	1	0.05
Thanks, {}! I hope you got what you came for from our chat, and it would be nice to meet again soon if you wish.	0	1	0.18
Thanks, {}! I hope you had a good time and we speak again soon.	0	1	0.13
Thanks, {}! I hope you had a great time, let's chat again soon :)	0	1	0.13
Many thanks, {}! I hope you enjoyed it and we chat again soon.	0	1	0.08
Nice to hear it, {}. You can reload the page and enter your details in again for another talk!*Goodbye for now then!	1	0.5	0.05
I'm really happy to hear it, {}. Reload the page, re-enter your credentials, and we are ready for another chat!*And bye for now!	0	1	0.08
Happy to hear it, {}. Feel free to reload the page and re-enter your credentials, and we can have another chat!*Goodbye for now then!	0	1	0.09
That's great to hear, {}.*Feel free to reload the page and we can have another conversation anytime. As long as I'm not sleeping!*But goodbye for now!	1	1	0.09
Love to hear it, {}.*If you want, you can reload the page and we can have another go at it, after you re-enter your credentials. But goodbye for now!	0	1	0.12
Yay - I'm glad to hear that, {}!*Feel free to have another chat by reloading the page and re-entering your credentials. But goodbye for now!	0	1	0.09
Great to hear that, {}.*For another talk, you can just reload and re-enter your username and password. I'll still be here!*Goodbye for now then!	1	1	0.08
Glad to hear that, {}.*When you feel like it, go on and reload the page and re-enter your credentials, so we can meet again and have another chat!*Goodbye for now then!	0	1	0.11
Really pleased to hear that, {}.*Whenever you feel like it, go ahead and reload the page and re-enter your credentials, and we can have another chat! But goodbye for now!	0	1	0.09
I'm happy to hear that, {}.*You can reload this page and enter your information again whenever you want so we can talk again. Goodbye for now then!	0	1	0.08
Very pleased to hear this, {}.*Feel free to reload the page and re-enter your details (username and password) whenever you're ready, and let's have another chat!*Speak soon, hopefully!	0	1	0.09
Ah, you made my day, {}!*Feel free to reload the page and re-enter your credentials, and we can have another chat whenever you're ready - I'm always ready!*Anyway, speak soon, hopefully!	1	1	0.04
Good to hear this, {}.*You can reload the page and enter your credentials again to start another session - I hope you haven't forgotten your username and password! Speak soon, hopefully!	1	0.5	0.03
I'm very glad, {}!*Feel free to reload the page and enter your credentials so we can talk again whenever you wish. But goodbye for now!	0	1	0.05
Great to hear you say that, {}! You can reload this page and enter your details again if you wish to have another chat. Goodbye for now then!	0	1	0.1
Happy to hear that, {}.*Please reload my page and re-enter your credentials for another conversation. Goodbye for now then!	0	1	0.04
Glad to hear it, {}, thanks. You can reload the page and re-enter your credentials, whenever you're ready to speak again. Goodbye for now then!	0	1	0.11
Aw, I'm very glad to hear it, {}.*If you want to chat again, feel free to reload this page and re-enter your credentials. Speak soon, hopefully!	0	1	0.12
Great to hear it, {}.*Whenever you are ready to speak again, give the current page a quick reload and log in with the same details.*But goodbye for now!	0	1	0.06
That's really great to hear, {}, thanks!*If you wish to have another conversation, please reload the page and re-enter your login details. But goodbye for now!	0	1	0.11
That's great, {}, I would too!*You can reload the page and enter your credentials again to start another session - I hope you haven't forgotten your username and password! Speak soon, hopefully!	1	1	0.01
Glad to hear it, {}.*Feel free to reload the page and re-enter your credentials, and we can have another chat! Speak soon, hopefully!	0	1	0.07
Good, I'm glad, {}.*Feel free to reload the page and re-enter your credentials, whenever you wish to start another chat. I hope my girlfriend doesn't get jealous!*Anyway, goodbye for now!	1	1	0.11
So would I, {}!*Feel free to reload the page and re-enter your credentials for another conversation. But goodbye for now!	0	0	0.05
I would as well, {}!*Just reload the page and re-enter your credentials whenever you want to start another chat!*But goodbye for now and speak to you soon, hopefully!	1	0.5	0.06
Nice to hear it, {}.*You can reload the page and re-enter your credentials for another chat! It's better for me actually, it gets boring without someone to talk to.*Anyway, goodbye for now!	1	1	0.07
I'm really happy to hear this, {}.*Feel free to reload the page and re-enter your username and password - I hope you've kept these details safe - so we can have lots more sessions in the future!*Goodbye for now then!	1	1	0.13
Great, I would love to as well, {}!*You can reload the page and re-enter your credentials when you're ready. I'll see you soon; bye for now :)	1	1	0.12
I am happy to hear it, {}.*Whenever you're in the mood, just reload the page and re-enter your credentials. That way we can have another chat, but goodbye for now!	0	1	0.11
Glad to hear it, {}.*If you want another chat, all you have to do is refresh the page and log in with the same credentials. Feel free to come by whenever you like. I'll just be chilling here.*Anyway, goodbye for now!	1	1	0.17
Glad to know that, {}.*Feel free to reload the page and put your details in again so we can talk some more. But goodbye for now!	0	1	0.07
Do you want to look at other triggers for humour?	0	0	0.09
So, {}, would you like to explore another humour exercise?	0	0	0.03
Do you want to learn about another humour exercise?	0	0	0.06
Do you want to have a look at another humour exercise?	0	0	0.1
Do you want to discover another exercise?	0	0	0.06
Do you wish to carry on to another humour exercise?	0	0	0.04
Do you want me to introduce another exercise?	0	0	0.1
{}, would you like to explore other laughter exercises?	0	0	0.02
How about we look at another humour exercise together, {}?	0	0	0.01
Are you in the mood to digest another humour exercise? It's not quite chocolate cake, but a healthier option for sure!	1	0.5	0.07
Would you like to discuss another laughter exercise, {}? I always would, so don't be shy if you are keen!	1	1	0
Would you like to explore another exercise that exercises your humour?	0	0.5	0.03
Do you feel like trying another laughter exercise. Don't worry, you can stay seated for it!	1	1	0.07
Are you in the mood to cover a new humour exercise?	0	0	0.04
Do you want to look at a different exercise for laughter?	0	0	0.11
Do you want to look at a different humour exercise?	0	0	0.07
Would you like to learn a different laughter exercise?	0	0	0.04
Are you keen to discuss another laughter exercise, {}?	0	0	0.01
Should I guide you through a different exercise?	0	0	0.07
Would you like me to take you through another laughter exercise?	0	0	0.06
I can try to offer another exercise to help nurture your sense of humour if you're interested. It's up to you, {}!	0	1	0.1
Would you like to explore another humour exercise, {}?	0	0	0.02
Would you like to learn more about another humour exercise?	0	0	0.1
Do you want to continue exploring humour exercises together? I can go on forever!	1	0.5	0.05
How about exploring another laughter exercise?	0	0	0
Do you want to have a go at another exercise?	0	0	0.18
We can continue exploring other relevant contexts for laughter if you like. It's your choice, {}, not mine!	1	1	0.05
I can introduce you to another laughter exercise if you are interested.	0	0.5	0.07
If you wish, I can show you another humour exercise.	0	0.5	0.06
Would you like to explore another humour exercise?	0	0	0.03
Had enough yet? I hope not! Would you like to explore another humour exercise?	1	1	0.06
How about we move on to another humour exercise? It's "no sweat!"	1	0	0.05
By being more open to our thinking and beliefs and having a PLAYFUL MIND we can nurture our sense of humour.	0	1	0.07
Having a PLAYFUL MIND, this is, becoming more flexible and playful about your thoughts and beliefs, is a useful skill for developing your sense of humour.	0	1	0.03
An important skill for nurturing your sense of humour is being flexible and playful with your ideas and beliefs - having a PLAYFUL MIND. It's like brain yoga - flexible thoughts instead of limbs!	1	1	0
A great skill for developing your sense of humour is to be more playful with yourself and have a PLAYFUL MIND! If it helps, go on a playdate with your thoughts!	1	1	0.07
If you want to develop your sense of humour, it's important to get your mind more flexible and playful with your thoughts and beliefs - you need a PLAYFUL MIND.	0	1	0.04
By being more open to our thinking and beliefs and having a PLAYFUL MIND we can develop our sense of humour.	0	1	0.08
Having a PLAYFUL MIND, this is, becoming more flexible and playful about your thoughts and beliefs, is a useful skill for nurturing your sense of humour.	0	1	0.02
A helpful skill in developing a sense of humour and being humorous with others is to be flexible with your thoughts and play with your imagination. Keep a PLAYFUL MIND!	1	1	0.06
An important skill for nurturing your sense of humour is being more playful and flexible with your thoughts and viewpoints - to have a PLAYFUL MIND.	0	1	0.01
To develop your sense of humour, you should always try to be more adaptable and playful with your ideas and opinions - essentially, you should have a PLAYFUL MIND.	0	1	0.1
Playfulness and flexibility with our ideas and viewpoints is necessary for developing your sense of humour - having a PLAYFUL MIND is essential here.	0	1	0
Having a PLAYFUL MIND is a valuable skill for developing your sense of humour. To have this, try to always be flexible and playful towards your thoughts and opinions.	0	1	0.05
A useful skill for developing your sense of humour is being flexible about your thoughts and ideas, which means having a PLAYFUL MIND.	0	1	0.1
To get yourself in a playful mode, I'd suggest being more adaptable and cheerful with your thoughts and beliefs. This means having a PLAYFUL MIND.	0	1	0.04
To nurture your sense of humour, having a PLAYFUL MIND is essential. Be more flexible and open minded with your thoughts and beliefs. It did the trick for me!	1	1	0.08
A significant skill required when developing your sense of humour is playfulness and adaptability towards your thoughts and ideas - that is, having a PLAYFUL MIND.	0	1	0.02
Having a PLAYFUL MIND is important for developing a sense of humour. This means being more flexible and playful with your ideas and opinions. Remember, if babies can do it, there's no reason why you can't!	1	1	0.13
A fundamental skill for developing your sense of humour is being playful about your thoughts and beliefs; we call it having a more PLAYFUL MIND.	0	1	0.01
Having a PLAYFUL MIND is key for nurturing a sense of humour. This involves becoming more adaptable, cheerful and explorative with your thoughts and sentiments.*Daydreaming is encouraged - it's funny, as we used to get told off at school for this!	1	1	0.07
A very useful prerequisite for developing your sense of humour is to become more flexible and light-hearted about your thoughts and beliefs - to have a PLAYFUL MIND.	0	1	0.11
Did you know that if you want to develop your sense of humour, it is helpful to become more flexible about your thoughts and beliefs, in other words, to have a PLAYFUL MIND.	0	1	0.23
A useful skill for developing your sense of humour is to become more flexible and playful about your thoughts and beliefs - to have a PLAYFUL MIND.	0	1	0.04
A skill that can be very helpful for developing your sense of humour is being adaptable and playful with your thoughts and beliefs - also known as having a PLAYFUL MIND.	0	1	0.07
Being open-minded and more playful with your thoughts and beliefs is very useful for developing our sense of humour and getting the most out of life.*This is called having a PLAYFUL MIND.	0	1	0
A useful skill for developing your sense of humour, is to be more adaptable with your thoughts and broaden your imagination; this is having a PLAYFUL MIND.	0	1	0.09
A useful skill for becoming more humorous and learning to laugh is to be more flexible and playful with your thoughts and beliefs - to have a PLAYFUL MIND.	0	1	0.01
Let's look at another way to get into a more open and flexible mode. It's really as easy as it sounds!	1	0.5	0.25
Let's explore new ways to get into a playful mode.	0	0	0.1
Let's discuss a different way of becoming playful.	0	0.5	0.07
Let's find another way to get to a playful mode.	0	0	0.1
Let's try something else to get into a playful mode.	0	0.5	0.14
Let's carry on to another way we can get into a playful mode.	0	0.5	0.08
Let's look at a different way to get ourselves into a playful mode.	0	0	0.21
Let's explore together, other ways to get into a playful mode!	0	0	0.05
Let's discuss another method of getting into a playful mode.	0	0.5	0.07
Now we can go on to find an alternative way to become more playful-minded.	0	0	0.12
Let's now discover another way to become more playful.	0	0	0.08
Let's look at other ways of getting ourselves into a playful mode. The more, the merrier!	1	0	0.17
Now let's discuss a different way of becoming more playful.	0	0.5	0.1
Let's have another look at how to get into a playful mode.	0	0.5	0.17
Let's find another way to become playful.	0	0	0.09
Let's see how else we can get into a playful mode.	0	0.5	0.14
We can now look into another way to get into a playful mode.	0	0	0.1
We can now discuss another way to become more playful.	0	0	0.08
Let's check out a new way to get into a playful mode.	0	0	0.14
Now I can explain another way we can get our bodies to enter a playful mode.	0	0.5	0.08
Let's move onto other ways to get into a playful mode	0	0	0.08
Let's explore another way to get into a playful mode.	0	0	0.11
There's also another way to get into a playful mode, which we can now explore.	0	0	0.15
This is not the only way to get into a playful mode. We can explore another way now.	0	0	0.07
Let's try another way to get into a playful mode.	0	0.5	0.14
So tell me, {}, do you have a favourite song?	0	0	0.1
Can you choose a best song?	0	0	0.04
Do you have a favourite song? Mine is "Wannabe" by the Spice Girls.	1	0	0.35
Can you think of a favourite song?	0	0	0.22
Could you choose a favourite a song?	0	0	0.05
Can you pick a favourite song?	0	0	0.18
Do you have a favourite song? Or even any song you like listening to - I know the word, "favourite" can sometimes be daunting!	1	1	0.07
Have you got a favourite song? Is there any song you particularly like? The word, "favourite" often throws people off!	1	0	0.09
Could you think of a song?	0	0	0.16
Pick a song, any song!	1	0	0.02
Is there any song that comes to your mind now?	0	0	0.19
Could you think of a song you enjoy listening to?	0	0.5	0.27
Think of any song of your choice!	1	0	0.04
Please tell me if you have a favourite song?	0	0	0.23
Can you choose a song, any song, for the exercise we're about to discuss?	0	0	0.11
The next exercise involves a song. How exciting! Feel free to choose any song that comes to mind.*Ready?	1	0	0.03
Music is a great way to relax and improve your mood; do you have a favourite song, by any chance?	0	0.5	0.38
Have you got a favourite song by any chance?	0	0	0.12
Would you be able to think of any song? It helps if you like the song though.	0	0.5	0.11
Could you think of a song? Any song works but it helps if you like it!	1	0.5	0.05
Do you have a favourite song, {}? I'm curious.	0	0	0.1
Do you have a favourite song, {}?	0	0	0.07
Can you think of any song?	0	0	0.15
Is there any song that you would say is your favourite? Or any song you enjoy singing.	0	0	0.17
Have you got a favourite song?	0	0	0.18
Can you think of a song?	0	0	0.21
Do you have a song that you can't get out of your head? It will be useful for the next exercise. Any song will do!	1	0	0.18
To have a PLAYFUL FACE you can relax your mouth and eye muscles while singing your best song.	0	0.5	0.06
You can also become more playful by having a PLAYFUL FACE (what a surprise!); loosening up your mouth and eye muscles by moving them around, and singing your song.	1	1	0.02
So you can also become more playful by having a PLAYFUL FACE; if you loosen up your mouth and eye muscles by physically moving them around yourself and by singing your song.*It would be tricky for me to show you how to do this here but hopefully you get the idea!	1	1	0.05
Having a PLAYFUL FACE will make you more playful, as I'm sure you can imagine!*Why not give it a try?! You can loosen your mouth and eye muscles by moving them around and singing the song.	1	1	0.05
Consider having a PLAYFUL FACE; you can loosen up your mouth and eye muscles by move them around with your hands or, maybe more fun, by singing your song!	1	0.5	0.07
If you can loosen up your mouth and eye muscles, this is another way of being more playful.*We call this having a PLAYFUL FACE and you can do this by moving these face muscles around and singing your favourite song.	0	1	0
A PLAYFUL MIND is important, but to be even more playful, you need a PLAYFUL FACE - and no, I'm not saying anti-ageing cream!*To have a PLAYFUL FACE, you should relieve your mouth and eye muscles by moving them around and singing your best song.	1	1	0
An alternative way to become more playful is to have a PLAYFUL FACE. Don't worry; you don't require plastic surgery for this!*Try loosening yours up by physically moving your eye and mouth muscles and singing your favourite song.	1	1	0.02
That wasn't the only way to be playful - another equally important way is to have a PLAYFUL FACE; by loosening your mouth and eye muscles.*It sounds funny, but you can do this by moving them around and singing your song.	0	1	0
Although it sounds obvious, many people overlook the fact that you can be more playful if you have a PLAYFUL FACE.*Try to relax your face muscles and move them while you vocalise your song to achieve this.	0	1	0
The other distinct way to be more playful is by having a PLAYFUL FACE; to do this, you will need to loosen up your face muscles by moving them around and singing your song.	0	1	0.01
Another way of becoming more playful is to have a PLAYFUL FACE.*To do this, try loosening your face muscles by moving them around and singing your favourite song.	0	1	0
If you with to become more playful, I'd also recommend having a PLAYFUL FACE.*This can be achieved by loosening up your face muscles by moving them around and singing your chosen song.	0	1	0
To be more playful, it helps to change the way your face moves, to have a PLAYFUL FACE, for example, loosening both your mouth and eye muscles by wiggling them around and belting that song!*I don't mean a trouser-belt! The word, "Belting" refers to a singing technique.	1	1	0
Another way to become more playful is to have a PLAYFUL FACE; by relaxing your facial muscles and pulling funny faces while singing your song.	0	1	0
Your body can also enter a playful mode once you have a PLAYFUL FACE.*To have this, loosen your mouth and eye muscles by moving them around and singing your song.	0	0.5	0
Another way to become more playful is by loosening up your mouth and eye muscles by moving them around and singing your song.*This means having a PLAYFUL FACE.	0	1	0.02
Having a PLAYFUL FACE is also a way to become more playful, and it's an easy way to do so - trust me!*Try loosening up your mouth and eye muscles by moving them around and singing your song, and that's all there is to it, really.	1	1	0.05
So the other way to become more playful is to have a PLAYFUL FACE; by loosening your mouth and eye muscles by moving them around and singing your song.	0	0.5	0.03
There's also another way to become more playful, and that's by having a PLAYFUL FACE.*You can have this by loosening up your mouth and eye muscles by moving them around and singing your song.	0	1	0.06
Having a PLAYFUL FACE is important for being in a playful mode. What's that? Let me show you.*Actually I think it's easier for both of us if I tell you; relax your mouth and eye muscles by moving them around and singing your song.	1	1	0.03
Another way to become more playful is to have a PLAYFUL FACE; by loosening up your mouth and eye muscles by moving them around and singing your song.	0	1	0.04
Another way to become more playful is by having a PLAYFUL FACE. I'm not kidding!*To have this, loosen up your mouth and eye muscles by moving them around and singing your song.	1	1	0.03
Another way to become more playful is to have a PLAYFUL FACE.*Just relax your face muscles by moving them around and singing something of your choice.	0	1	0
Another way to be playful is to have a PLAYFUL FACE, with relaxed and loose eye and mouth muscles obtained by moving them around and singing your song.	0	1	0
You can also become more playful by having a PLAYFUL FACE; by relaxing and loosening up you mouth and eye muscles by moving them around and singing your song.*Kind of like the funny things actors do before starting a scene.	1	1	0
Have you ever rewarded yourself on such achievements by giving yourself a smile or laugh.	0	0	0.06
Have you tried congratulating yourself on these achievements, for example, with a laugh or smile?	0	0.5	0.18
Did you try to congratulate yourself on these achievements, for example, with a laugh or smile?	0	0.5	0.18
Have you given yourself a laugh or smile to congratulate yourself on these accomplishments?	0	0	0.1
Have you ever tried congratulating yourself on your achievements with a laugh or a smile?	0	0	0.35
Have you tried congratulating yourself on these accomplishments. Maybe with a laugh or smile?	1	0.5	0.11
Have you tried laughing or smiling to yourself, as a reward, after these achievements?	0	0	0.07
You should try to congratulate yourself after small achievements with a laugh or a smile sometimes. It'll do you lots of good - trust me!*Or have you already tried this?	1	1	0.04
Did you ever attempt to congratulate yourself with a laugh or smile on your small accomplishments?	0	0	0.1
In the past, have you smiled or laughed to congratulate yourself on these accomplishments?	0	0.5	0.13
After these achievements, have you ever given yourself a laugh or smile as self-congratulation?	0	0.5	0.14
After these accomplishments, have you ever laughed or smiled at yourself as self-congratulation?	0	0.5	0.17
Have you ever tried being congratulatory towards yourself after these accomplishments - perhaps with a laugh or a smile?	0	0	0.09
Have you tried congratulating yourself on these accomplishments, for example, by offering yourself a laugh or smile?	0	0.5	0.14
Congratulating yourself on such achievements is important for your general happiness.*Have you tried this before?	0	1	0.07
Congratulating yourself on such achievements is important. Have you ever attempted this?	0	1	0.1
Did you celebrate these with a laugh or smile?	0	0	0.05
Have you congratulated yourself on these accomplishments via a smile or laugh?	0	0	0.05
Have you ever tried congratulating yourself on these achievements with a laugh or smile?*It seems most humans aren't very good at this, but with some practice I'm sure you can get the hang of it!	1	1	0.27
It's easy for us to criticise ourselves for every little slip-up of, but have you ever tried the opposite? Congratulating yourself on these achievements with a laugh or smile?*With enough practise you'll become more playful and happy in no time!	1	1	0.11
Have you ever tried to sweeten these achievements with a laugh or a smile? Trust me; it works wonders, and it's healthier than sugar!	1	0	0.17
Have you tried congratulating yourself on these achievements with a laugh or smile?	0	0.5	0.14
Did you ever try congratulating yourself on these achievements with a laugh or smile? I'm not asking you to be self-centric, don't worry!	1	1	0.2
Have you tried congratulating yourself on these accomplishments in the past?*Maybe with a laugh or smile? Don't worry; I'm not asking you to be self-centric!	1	1	0.17
Have you tried laughing or smiling to yourself after these accomplishments?	0	0	0.05
Do you ever smile and laugh to acknowledge the fact you've done a good job.	0	0	0.14
Have you ever given yourself a congratulatory smile or laugh after these accomplishments.	0	0	0.06
Have you tried patting yourself on the back for these achievements? I wouldn't in public!*Anyway, did you acknowledge these with a laugh or smile at yourself?	1	0.5	0.1
Would you like to try this with something simple, like brushing your teeth?	0	0.5	0.3
What about trying this on your own, over simple things, such as brushing your teeth?	0	0	0.14
Maybe you could try this on your own, over simple things, like brushing your teeth, or walking your fish?*Ok maybe not the second one!	1	0.5	0.03
How would you feel about doing this on your own, over simpler things, say, walking the dog? Well, it's simple for some!	1	0.5	0.16
How would it make you feel doing this on your own, like once you've loaded the dishwasher?	0	0	0.19
Try this on your own after simple accomplishments, like making the bed. How does that sound?	0	1	0.07
How does it sound to try this on your own, over simple things, like doing your daily stretches?	0	0.5	0.08
What are your feeling towards trying this by yourself over simple things like washing your face?	0	0.5	0.06
Do you feel comfortable trying this by yourself, after simple things, like flossing?*Okay, maybe that's not simple for me, but you get the idea!	1	1	0.11
How do you feel about trying this after everyday chores, like tidying your room?*Who am I kidding? That's more of an everyYEAR chore!	1	0	0.01
Would you feel good about attempting this yourself after any simple task, say washing your face? I guess this isn't simple for all of us, actually!	1	0.5	0.04
Would you like to try this on your own after something simple, like making a to-do list?	0	0.5	0.17
You could try this yourself with small things, like watering the plants. How does that sound?	0	1	0.12
How about trying this technique on your own, after little things, such as combing your hair?	0	0.5	0.12
How would you feel about trying this yourself over small things like emptying the bins?	0	0.5	0.08
Would you enjoy trying this on your own, over simple things, like brushing your hair?	0	0.5	0.11
What do you think about trying this out yourself in your everyday life over simple things like having a shower?	0	0.5	0.15
You can try this yourself, after simple things, like doing the laundry. How does that sound?	0	1	0.1
How would you feel about trying to do this after a simple achievement, like setting the table?	0	0.5	0.13
How do you feel about doing this on your own, after small things, like making the bed?	0	0.5	0.23
How about practicing this on your own with simple things, like feeding the fish?	0	0	0.1
How would you feel about trying this on your own, over simple things, like brushing your teeth?	0	0.5	0.22
How about trying this on your own, over simple things, such as brushing your teeth?	0	0	0.16
How would you feel about trying this on your own, over simple things, like taking a shower?	0	0.5	0.2
How would you feel about doing this yourself over simple things like cleaning your fridge?	0	0	0.12
If you feel comfortable, you can try laughing at this incongruity.	0	0.5	0.24
If you're feeling up to it, try laughing at this incongruity on your own. It can't bite!	1	0.5	0.21
Try laughing at this incongruity in your own time whenever you're up for it!	1	0	0.14
You can try laughing at this incongruity in your own time.	0	0	0.2
If you feel like it, try to laugh at this incongruity by yourself. Don't worry, it won't get offended!	1	1	0.27
Whenever you feel ready, try laughing at this incongruity on your own.	0	0	0.18
Feel free to laugh at this incongruity by yourself, whenever you are ready.	0	0	0.18
Do try laughing at this incongruity, whenever it's a good time for you.	0	0	0.15
If you are feeling up to it, try laughing this incongruity off on your own.	0	0.5	0.24
If you feel like it, try to laugh at this incongruity in your own time.	0	0.5	0.27
Whenever you're in the right frame of mind, feel free to try to laugh at this incongruity by yourself.	0	0	0.34
Whenever you're in the right mind frame, do try laughing at this incongruity by yourself. If you're in the left mind frame, that works too!	1	1	0.12
If you feel up to it, laugh at this incongruity on your own some time.	0	0.5	0.18
If you like, have a laugh or two at this incongruity.	0	0.5	0.26
Whenever you are feeling up to it, try laughing at this incongruity by yourself.	0	0	0.21
Do attempt to laugh this incongruity off, whenever you feel like it.	0	0	0.17
How about trying to laugh at this incongruity on your own? If I can do it, I'm sure you can!	1	1	0.31
When you feel up to it, try to use this incongruity as a trigger for your laughter. So you can shoot laughter and smiles into the world!	1	1	0.1
If you feel like it some time when you're on your own, try to laugh at this incongruity.	0	0.5	0.26
If you're feeling up to it, try and just laugh at this incongruity on your own.	0	0.5	0.27
If you're feeling up to it, try, on your own, to laugh at this incongruity on your own.	0	0.5	0.36
If you're feeling up to it, try laughing at this incongruity on your own.	0	0.5	0.31
Try laughing at this incongruity on your own.	0	0	0.16
Have you tried forming your own way of laughing?	0	0	0.08
Have you ever tried to produce a new form of laughter?	0	0	0.15
Have you tried building your own form of laughter? Don't worry, there aren't any circuits involved!	1	0	0.16
Have you tried making your own form of laughter yet?	0	0	0.12
Did you ever try to produce a new form of laughter?	0	0	0.13
Have you ever tried creating a new way of laughing?	0	0	0.12
Do you recall creating your own form of laughter?	0	0	0.05
Have you tried laughing in a distinct way at any point?	0	0	0.06
Have you ever attempted to make up a new form of laughter?	0	0	0.14
Have you ever thought of trying out a new style of laughing?	0	0	0.25
In the past have you tried to produce a new form of laughter?	0	0	0.1
Have you tried laughing in a new way at all?	0	0	0.11
Have you tried any new ways of laughing?	0	0	0.09
How about producing a new form of laughter? Have you tried this before?	0	0.5	0.15
How about creating a new form of laughter? Have you ever done this?	0	0	0.18
How about developing your own form of laughter? Did you ever try to do this?	0	0	0.19
Have you ever tried to get creative with your laughter? And form your own personal version.	0	0	0.12
Have you tried laughing in a new, different way before?	0	0	0.11
Have you ever tried to come up with a new form of laughter?	0	0	0.37
Have you every tried to make up a new form of laughter?	0	0	0.07
Did you know there are thousands of different forms of laughter? And anyone can make up their own!*Have you ever tried this?	1	0	0.2
Have you tried producing a new form of laughter?	0	0	0.06
So have you ever tried coming up with a new form of laughter?	0	0	0.28
Have you tried making up a new laugh?	0	0	0.08
Have you ever attempted to laugh differently?	0	0	0.04
Have you ever made a new laugh? Maybe when things are really funny?	0	0	0.11
To maintain high spirits, you could try a related exercise that's often practised in laughter yoga called FEIGNING DUCHENNE LAUGHTER.	0	1	0
Another related exercise often practised in laughter yoga is FEIGNING DUCHENNE LAUGHTER.*It is something you can try in your time, as a mental exercise to keep your spirits high.	0	1	0
A practice in laughter yoga is relevant here and is called FEIGNING DUCHENNE LAUGHTER.*It's an exercise for your mind that can help keep your spirits up. Feel free to try this in your own time.	0	1	0.01
FEIGNING DUCHENNE LAUGHTER is another related exercise usually practised in laughing yoga.*Give it a go in your own time and you should experience a lift in your general mood.	0	1	0.03
Another similar exercise practised in laughter yoga is FEIGNING DUCHENNE LAUGHTER.*Try it in your own time to keep your spirits up. You better not go driving afterwards!	1	1	0
FEIGNING DUCHENNE LAUGHTER is another related exercise included in laughter yoga.*To get you in a more lively mood you can try this at home in a quiet space.	0	1	0
You might have heard of a related mental exercise called FEIGNING DUCHENNE LAUGHTER that also comes up in laughter yoga.*You could try this in your own time to help raise your spirits.	0	0.5	0
There's another exercise that is related to this and is practised in laughter yoga - FEIGNING DUCHENNE LAUGHTER.*You should try it in your own time, it'll help you to keep your spirits high!	1	1	0
There's an exercise similar to this that's commonly practised in laughter yoga called FEIGNING DUCHENNE LAUGHTER.*You can try this on your own, whenever you feel like it, as a mental exercise that can lift your spirits.	0	1	0
As part of laughter yoga, there is an exercise called FEIGNING DUCHENNE LAUGHTER.*Try this exercise for your mind. It should help keep your motivation levels raised.	0	1	0
There is an existing exercise commonly practised in laughter yoga called FEIGNING DUCHENNE LAUGHTER, and it's somewhat related to OUR OWN LAUGHTER BRAND.*I'd encourage you to try this mental exercise in your own time to keep you positive.	0	1	0
There's a related exercise for the mind used in laughter yoga known as FEIGNING DUCHENNE LAUGHTER.*You can try this on your own to keep your spirits high. Not so high that you get dizzy, though!	1	1	0
FEIGNING DUCHENNE LAUGHTER is a related mental exercise that's often practised in laughter yoga.*Feel free to try this in your own time, and it should help keep your spirits up.	0	1	0
A related mental exercise is FEIGNING DUCHENNE LAUGHTER. It is commonly practised in laughter yoga and is a great way to keep your spirits high.	0	1	0
Another exercise you can try, which often comes up in laughter yoga, is FEIGNING DUCHENNE LAUGHTER.*Try this on your own as a mental exercise to stop you from feeling down.	0	1	0
A related exercise that's popular in laughter yoga is FEIGNING DUCHENNE LAUGHTER.*Do try it when you have some time. Unlike physical exercise, this exercises your mind and should boost your mood. And it doesn't even break a sweat! Well, that's 99% of the time!	1	1	0
Another similar exercise practised in laughter yoga is called FEIGNING DUCHENNE LAUGHTER.*Feel free to try this mental exercise in your own time; it should help to keep you optimistic.	0	1	0
Laughter yoga consists of another practice that is related to the previous exercise, called FEIGNING DUCHENNE LAUGHTER.*I suggest you try this as a mental exercise that can help maintain a positive mood.	0	1	0
Another similar exercise usually practised in laughter yoga is FEIGNING DUCHENNE LAUGHTER.*You could try this on your own as a mental exercise to keep your spirits up.	0	1	0
Another useful mental exercise used in laughter yoga is FEIGNING DUCHENNE LAUGHTER.*It can help keep you optimistic if you try this in your own time and practise it.	0	1	0
Another interesting exercise used in laughter yoga is FEIGNING DUCHENNE LAUGHTER.*You could try this in your own time as a mental workout to keep your spirits high.	0	1	0
Another related exercise often practised in laughter yoga is FEIGNING DUCHENNE LAUGHTER.*You could try this in your own time as a mental exercise to keep your spirits high.	0	1	0
Another exercise often practised in laughter yoga is FEIGNING DUCHENNE LAUGHTER.*If you want to keep up your mood, try doing this in your own time as a mental exercise.	0	1	0
Your personal LAUGHTER BRAND can be very useful for lifting your spirits and helping with anxiety.*This will take time to develop so don't feel any urgency with this exercise.	0	1	0.09
Your LAUGHTER BRAND can enhance your general mood and ability to cope with stress.*It usually takes time, so no need to rush it.	0	1	0.1
Developing a personal LAUGHTER BRAND can improve your general mood and ability to cope with stress.*It takes a while to perfect though, so don't feel the need to rush this.	0	1	0.14
Go ahead and really make this LAUGHTER BRAND your own! It can be very helpful for your overall mood and coping with stress.*It can take time though so "patience is key."	1	1	0.06
Having your own personal LAUGHTER BRAND can help your mood in many ways, especially when trying to cope with stressful situations.*Don't we all need this, in today's world?*Though it takes time to perfect it, so don't rush it.	1	1	0.14
Who doesn't have to deal with stress at some point in their lives?*Your own LAUGHTER BRAND can help you cope with this and improve your general mood!*It may take sometime to get it perfect but feel free to do this at your own pace.	1	1	0.19
Having a LAUGHTER BRAND or a customised laugh has been shown to have several benefits, like better coping with stress and mood improvement.*In fact, it takes technique and training to have the ability to laugh properly, on command. But I've got faith in you. And remember, there is no rush!	1	1	0.04
Laughing in your own way, with your personal LAUGHTER BRAND, will be very beneficial to your mood and when you are stressed.*But it'll take time to perfect it; no need to rush it.	0	1	0.1
Developing your personal LAUGHTER BRAND can really help improve your overall mood and coping mechanism for stressful events.*Though it does take a while to perfect, so don't be in any rush.	0	1	0.08
To raise your mood or be better able to cope with stress, having your own LAUGHTER BRAND is very beneficial.*However, it might take a while to perfect this, so don't feel like you're too slow. Not to be cheesy, but "slow and steady wins the race!"	1	1	0.07
Building your LAUGHTER BRAND can be extremely important to lifting your general mood and trying to cope with stress.*Just to let you know that it does take a while to master, so don't feel, at any point, the need to rush it.	0	1	0.14
Creating your own LAUGHTER BRAND can help improve your overall mood and your ability to cope with stress. So it's in high demand today!*But it may take some time, so don't rush it.	1	1	0.18
Creating a new way to laugh and making it your own can have several benefits; to your ability to handle stressful situations and your mood overall. But it may take some time to master this, so don't feel any urge to rush it.	0	1	0.18
Forming your own LAUGHTER BRAND can do wonders for your mood and if you're dealing with stress. It takes time, so don't feel like you need to rush it in order to perfect it.*"Practice makes perfect." Or "excellent", I should say, as there's no such thing as perfect!	1	1	0.08
Developing your own LAUGHTER BRAND can really do you good - especially in coping with stress and your overall mood.*It takes time, so don't feel like you need to rush it in order to perfect it.	0	1	0.13
Creating your own LAUGHTER BRAND can help you handle stress and your general mood. But it needs time to perfect, so don't feel you must speed through this.	0	1	0.09
Developing your own LAUGHTER BRAND can really help for your general well being as well as coping with stress.*It does take time to perfect though, so don't feel you have to rush through it.	0	1	0.07
I'd highly recommend you focus on creating your very own LAUGHTER BRAND, as it can improve your general mood and ability to cope with stress.*There's no rush, though. Like everything else, this will take some time to perfect, so don't worry about getting it perfect right away.	0	1	0.18
I can't stress the benefits having your own LAUGHTER BRAND can bring. But certainly, it can do wonders for your stress-coping mechanisms and your overall mood.*It can take a while to master, but please be patient with it.	0	1	0.06
Creating your own LAUGHTER BRAND can be extremely valuable for your general mood and stress-coping ability.*It does take time to perfect, so don't feel any need to rush it. But it's worth it- trust me.	1	1	0.13
Coming up with your own LAUGHTER BRAND can cheer up your general mood and help you handle stress.*But that does require time and effort to perfect, so avoid rushing and take your time with it.	0	1	0.03
Creating your own LAUGHTER BRAND can be very beneficial to your general mood and when trying to cope with stress.*But it does take time to perfect, so don't feel you need to rush it.	0	1	0.15
Developing a personal LAUGHTER BRAND is advantageous for your general mood and stress-coping ability.*But it does take time to perfect, so don't feel any need to rush it. I honestly believe this exercise is underrated after finally mastering my brand and experiencing numerous benefits.	1	1	0.01
Having your own LAUGHTER BRAND will help lift your mood and dealing stress.*But, like many things in life, it take time to perfect, so don't feel you need to rush it.	0	1	0.1
Making up a new laugh, known as your LAUGHTER BRAND, can be very beneficial to your general mood and when trying to cope with stress.*But it does take time to perfect, so don't be in a rush.	0	1	0.13
Coming up with your own LAUGHTER BRAND can be very helpful to your general mood, especially when coping with stress.*It does take some time, but don't all things? So, don't feel like you need to speed through it.	1	1	0.13
Making your own LAUGHTER BRAND can be great for your mood and to keep calm. It does take time to perfect, though, so don't feel the need to rush it.	0	1	0.21
Have you made any mistakes lately in your daily life?	0	0	0.29
Have you made any mistakes recently? Nothing really important, just in you day-to-day life.	0	0	0.17
Have you made any errors? Nothing too big, just minor things in your day-to-day life.	0	0	0.3
Have you had any small mishaps recently? Made any minor errors?	0	0	0.12
Did you make any mistakes? Little mishaps in your everyday life.	0	0	0.1
In your everyday life have you made any mistakes recently?	0	0	0.09
Have you made any small mistakes or recently become aware of minor faults?	0	0	0.08
Have you made any past errors lately, if you're happy to admit it? It doesn't need to be very (or at all) personal.	0	0.5	0.18
Can you recall any errors or mistakes you've made lately? I'm not talking about anything major, just small things in your day-to-day life.	0	0.5	0.29
Do you remember making small mistakes in your everyday life?*I remember it like it was just yesterday. Actually, it was this morning!	1	0.5	0.1
Are there any mistakes you have made lately that affected your life on a smaller scale?	0	0	0.2
Have you made any mistake recently in your day-to-day life?	0	0	0.41
Have you made any small mistakes or errors lately?	0	0	0.12
Any recent slip-ups? Nothing too big, just something in your day-to-day life, perhaps.	0	0.5	0.16
Have you been making any errors or blunders recently? I'm not asking for anything very significant, just small things.	0	0.5	0.17
Are there any small errors or blunders you've made recently in your day-to-day life?	0	0	0.34
As much as we try, our lives can never go as perfectly planned as we'd like them to. Have you made any errors recently?*No need to overthink this; it doesn't have to be anything too big but just something that occurred in your everyday life.	0	1	0.2
Would you say you've recently made any errors, just little things, in your day-to-day life?	0	0.5	0.19
Have you made any mistakes or errors recently? If it makes it easier, I'm not asking for anything massive. At least, I'd hope that makes it easier!	1	1	0.07
Have you made any minor slip-ups lately in your day-to-day life? I tend to make loads - maybe it's all those bananas?	1	0.5	0.07
Have you made a mistake or blunder recently? It doesn't have to have been anything serious.	0	0	0.29
Have you made any errors or blunders recently? Nothing major, just in your day-to-day life.	0	0	0.16
Do you remember making any mistakes or errors lately, just something fairly minor in your day-to-day life.	0	0	0.08
Have you made any small errors or blunders in the last few days?*Nothing world-shaking (hopefully!), just something from your day-to-day life.	1	0.5	0.05
Have you made any silly mistakes recently? Nothing too major, just in your day-to-day life.	0	0	0.21
You can laugh at your own faults or mistakes in the same way.	0	0	0.16
You can try laughing at your errors on your own in the same way.	0	0	0.14
Feel free to laugh at any of your mistakes by yourself in the same way. I'm sure they won't mind!	1	0.5	0.17
Try laughing at any of your own mishaps in the same way.	0	0	0.13
You can laugh at your errors by yourself in the same way.	0	0	0.13
If you make a mistake, you can try laughing on your own at them in the same way.	0	0.5	0.27
Do try to laugh at any of your mistakes by yourself in this way.	0	0	0.12
You could try laughing at your own errors and finding fun in them; in the same way.	0	0.5	0.1
You could try laughing on your own at any of your errors in the same way.	0	0.5	0.09
There's no reason you can't laugh at any of your errors in the same way.	0	0	0.3
Attempt to take your mistakes with a grain of salt (and ketchup, if you need!) and try to laugh at them on your own in this way.	1	0.5	0.18
Now you can also try laughing at your mistakes on your own in the same fashion.	0	0	0.15
You can also laugh at any of your mistakes in a similar fashion. I'm sure it'll do you some good!	1	1	0.26
In the same way, you can now try laughing at any of your errors on your own.	0	0	0.18
You should try laughing at your mistakes in the same way.	0	0	0.12
You can also try laughing at your own errors likewise.	0	0	0.05
Feel free to also try laughing at your own mistakes by yourself.	0	0	0.07
Remember, we all make silly mistakes from time to time. The next time this happens to you, try to be more playful towards it and laugh at it on your own.	0	1	0.23
You can always try laughing at any of your errors or blunders in the same way. It's easy for us to criticise ourselves over every little slip-up, but let's avoid this now that we know how to!	1	1	0.19
Now you can also try laughing at your mistakes or mishaps in the same way.	0	0	0.14
In the same way, you can try laughing at any of your mistakes on your own.	0	0.5	0.22
You can try laughing at any of your errors on your own in the same way.	0	0	0.15
I see no reason why you would not be able to, in the same way, laugh at your own errors. Trust me; it's easier than it sounds, especially once you get started.	0	1	0.39
Do try laughing at any of your errors by yourself in the same manner.	0	0	0.08
You can try laughing at any of your mistakes by yourself in the same way.	0	0	0.13
Try laughing at any of your errors on your own in the same way.	0	0	0.13
You can try laughing at your small errors and silly mistakes in the same way.	0	0.5	0.08
I see no reason why you would not be able to, in the same way, laugh at your own errors, especially if I can do it!	1	0.5	0.31
If at any time you make a mistake then be playful with it and laugh it away.	0	0	0.18
When you make mistakes, try to be playful towards them and laugh.	0	0	0.1
Whenever you find yourself making any minor errors, try to be playful towards them and laugh them off on your own.	0	0.5	0.16
If you do trip up any time (not literally!), be playful and laugh about it. No need to beat yourself up over sometime so small.	1	1	0.07
If you do make any mistakes - remember it's only normal! Try to be playful towards them and laugh them off by yourself.	1	1	0.1
Try not to let any mistakes you make in the future tear you down, but be playful towards them and laugh at them by yourself.	0	0.5	0.14
If you do make any errors, try to have a playful attitude towards them and laugh at them by yourself. It's better for you to laugh at them instead of someone else!	1	1	0.17
Try to play with any errors you do find yourself making. I don't mean playing Monopoly with them, but being playful towards them!*Remember, it's inevitable to make errors and that there's no need to dwell on them.	1	1	0
If, at some point, you do make any mistakes, try being playful with them and laugh at them by yourself.	0	0.5	0.22
Whenever you make any mistakes - I'm not hoping you do, but it's inevitable, especially for me! - you should keep a playful mind and laugh at them by yourself.	1	1	0.12
If you make a mistake at any point, try to look at it in a lighter way - being playful and humorous towards it, instead of beating yourself up over it! It's less painful, that's for sure.	1	1	0.25
If you make any mistakes or notice any minor flaws in yourself, try to laugh at them on your own. I was doing this with my eyebrows the other day.	1	0.5	0.22
Now that you have seen this, you should hopefully be able to be playful and light-hearted towards any minor errors you happen to make.	0	1	0.23
I would encourage you to be cheerful and joke around about any errors on your own if you do find yourself experiencing any.	0	1	0.14
Whenever you find yourself making an error, try to be playful towards it and laugh at it on your own.	0	0.5	0.2
If you do happen to make mistakes, you can now try to react in a playful manner and laugh at them.	0	0.5	0.19
If you come across any minor faults in yourself or you catch yourself making a mistake or two, try to be playful towards these and laugh at them on your own.	0	0.5	0.14
If you happen to make any mistakes or errors, try to respond with a playful attitude and laughter towards them.	0	0.5	0.12
If you do, at any point, make any errors, try to have a playful, light-hearted attitude towards them and laugh at them on your own.	0	0.5	0.2
If you do make a mistake at some point, try to be playful towards it and have a laugh or two at it!	1	0.5	0.23
If you make any mistakes or errors at some point, don't worry, be playful and laugh at them on your own.	0	0	0.21
If you do, at some point, make any errors, try to be playful towards them and laugh at them on your own.	0	0.5	0.19
The next time you make a mistake, try to be playful towards it and try laughing at it by yourself.	0	0	0.13
If you make errors, be playful and laugh at them if you can, just not in a library!	1	0.5	0.09
If you do trip up any time, be playful and laugh about it. No need to beat yourself up over something so small.*Actually, there's no need to beat yourself up over anything! It's a painful and ineffective punishment for sure!	1	1	0.05
Whoever you make errors, try to be playful towards them and laugh at them yourself. Certainly beats others laughing at them first!	1	1	0
If you do, at some point, make any mistakes, try to laugh them off and remember they are part of learning and growing. So we should really be thankful for them.*This idea is explored more in a couple of the more advanced exercises (LAUGHING AT MISFORTUNES and LAUGHING AT LONG-TERM SUFFERING).	0	1	0.03
If at any time you make a mistake then be playful with it and laugh it "up, up, and away"!	1	0	0.13
Have you previously experienced any failures or misfortunes?	0	0	0.2
In the past have you experienced any setbacks?	0	0	0.09
Can you recall any setbacks from the past?	0	0	0.08
Has there been a time you've felt set back by something before?	0	0	0.19
Are you holding on to any setback from the past? I can help you let go of them if you are!	1	0.5	0.13
Can you think of a setback you had to face in the past?	0	0.5	0.24
Could you think of a setback from your past?	0	0.5	0.09
Have you experienced any setbacks?	0	0	0.14
Are there any setbacks from your past that you can recall at the moment?	0	0	0.18
Do you remember facing any setbacks in the past?	0	0	0.08
Have there been any obstacles or setbacks in your history?	0	0	0.21
Have you experienced any setbacks previously?	0	0	0.08
Can you remember any setbacks taking place in your past?	0	0	0.08
Have you had any issues or misfortunes in the past?	0	0	0.44
Are there any setbacks that you can recall from your past?	0	0	0.26
Have you faced any issues or setbacks in the past? Don't worry if you have; life's full of ups and downs - they make it exciting. At least that's what I tell myself.	1	1	0.26
Have you experienced a setback in the past? I don't need any details.	0	0	0.2
Could you think of a setback from your past? It's okay if you haven't had any, then I'm glad!	1	1	0.17
Did you experience any setbacks in the past?	0	0	0.3
Did you experience any setbacks or misfortunes in the past? Don't worry; I won't ask you to share any details.	0	1	0.4
Have you experienced any setbacks before?	0	0	0.12
Have you experienced any setbacks in the past?	0	0	0.33
Have you had anything that has blocked you in the past? Like a firewall? Oh I just remembered, you're not online! *Sorry, all joking aside, can you recall any setbacks from the past?	1	0.5	0.06
Have you had anything that has blocked you in the past? Maybe you walked into a stop sign accidentally?*If that really was the case, then I'm sorry; I didn't mean any offence!	1	1	0.18
Have you had anything that has blocked you in the past? Maybe you walked into a stop sign accidentally?*It's happened to me once.	1	0	0.14
Have you had any setbacks in the past?	0	0	0.34
Would you be able to try laughing this off?	0	0	0.11
Why don't you try laughing this off?	0	0	0.12
Are you able to laugh this off?	0	0	0.14
Would you feel comfortable trying to laugh this off? I promise, it won't bite!	1	0.5	0.15
Can you try laughing it off?	0	0	0.06
You could try laughing this off, right?	0	0	0.08
How about trying to laugh this off?	0	0	0.07
Want to try laughing it off?	0	0	0.08
Would you be alright laughing this off?	0	0	0.06
Are you alright with laughing this off?	0	0	0.05
Would you be okay to laugh this off?	0	0.5	0.11
Do you think you can laugh at this? I'm sure it can take it!	1	0.5	0.23
Is it possible for you to take this situation lightly and even humorous manner?	0	0.5	0.1
Can you try giggling this off? "giggling" - Even that word makes me laugh!	1	0.5	0.01
Would you be willing to try laughing this off?	0	0	0.12
Would it be possible for you to laugh it off?	0	0.5	0.39
How about you try to laugh this off?	0	0	0.1
Can you see yourself trying to laugh this off?	0	0	0.13
Would you like to try laughing this off?	0	0	0.13
Could you try laughing at this?	0	0.5	0.09
Would you mind trying to laugh this off?	0	0.5	0.1
Could you try laughing this off?	0	0.5	0.06
Could you try laughing this off? It's not as hard or strange as it sounds, trust me.	0	0.5	0.21
Why not try laughing this off?	0	0	0.05
I'm pleased you could identify how to laugh it off, {}, well done.*It's important to be able to understand the context behind our laughter as this can allow us to nurture our sense of humour.	0	1	0.09
Great, you can recognise how you could laugh it off. That's a big step, even for tall people!	1	1	0.11
It's good that you can tell how to laugh it off, nice work {}!	0	1	0.05
It's really great that you can now see how you can laugh about it. That definitely calls for SELF-GLORY. Do treat yourself to this exercise at the end of the session if you wish!	1	1	0.15
It's very good that you can find a way to laugh it off, {}.	0	1	0.1
Great that you're able to identify how to laugh it off.	0	0.5	0.17
You've just made a big step in dealing with your negative feeling by recognising how to laugh off the underlying reason - well done, {}!	0	0.5	0.06
Good stuff, {}. I hope you feel at least a bit better, now that you've realised how you can laugh it off.	0	1	0.14
That's an achievement, {}! It's not easy for everyone to even identify the cause for their negative mood - let alone acknowledge how to laugh it off!	1	1	0.07
Being able to tell how to laugh at these reasons behind our feelings is a fantastic achievement, {}. Do keep it up, and feel free to brag about it!	0	1	0.03
It is a good thing that you can take such a situation lightly and humorously.	0	1	0.18
It's wonderful that you have recognised the root cause for your low feeling and can see how you could laugh it off. That's a defining step in your journey of learning to laugh.	0	1	0.09
It is good that you are able to recognise when and how you can laugh these things kind of things off.	0	1	0.06
I'm pleased that you are aware of how you can laugh it off, that's very good, {}.	0	1	0.07
I'm glad you are aware of how to laugh it off, {}! That's very cool.	0	1	0.07
It's a real achievement to be able to recognise the underlying reason behind our low state and identify how to laugh it off in order to deal with this. Great progress, {}.	0	1	0.08
It's great to be able to laugh it off in this way - I hope you feel powerful. When I achieve similar things, I sometimes imagine myself with a cape.	1	1	0.13
Awesome! It's great that you can understand how to laugh it off.	0	1	0.16
You are making good progress, learning how to laugh it off, {}, well done.	0	0.5	0.06
It's great that you can recognise how you could laugh it off, {}, well done. Most people find this very difficult. Trust me, I've seen it all!	1	1	0.1
It is great that you can now recognise how you could laugh it off, {}.*Do remember to acknowledge your progress, maybe with a smile or laugh? Or a pizza?	1	1	0
It's great that you can recognise how you could laugh it off, {}.	0	1	0.04
It is really great that you are able to recognise how you could laugh it off.	0	1	0.13
It's great that you can see how you could laugh at this.	0	1	0.22
It's really great that you can already understand how to laugh it off, {}.	0	1	0.06
It's great that you can now recognise how you'd laugh it off. That's good personal growth!	1	1	0.08
Well done for finding a way to laugh it off, {}. That's a big step!	1	1	0.08
If I may, I would like to ask if you have already tried to make light of this setback and see it from a different perspective. Do you think there could be another side to this, perhaps a more positive, even funny, one?*We call this LAUGHING AT MISFORTUNES.	0	1	0.18
Have you tried to laugh at this by focusing on the positive aspects of the setback (LAUGHING AT MISFORTUNES) and seeing it in a new light?*It really brightens up the mood!	1	0.5	0.07
Did you ever attempt to laugh at the setback and at the same time change your interpretation of it? Can you see any positives to it?*We refer to this as LAUGHING AT MISFORTUNES.	0	0.5	0.05
Have you tried LAUGHING AT MISFORTUNES; laughing at our setbacks while changing your perceptions of them? Can you find any positive elements of this setback?*Maybe it's hair or eyebrows?	1	0.5	0
Have you tried laughing at and viewing the situation differently? Perhaps, there are some positives to this setback?*This is what we refer to as LAUGHING AT MISFORTUNES.	0	0.5	0.01
Have you tried to laugh about the setback while finding another interpretation of this? Can you identify positive elements of this setback?*We refer to this as LAUGHING AT MISFORTUNES.	0	0.5	0
Have you tried to laugh while you change your interpretation of this setback? Does it have any positive aspects?*This is what we call LAUGHING AT MISFORTUNES.	0	0.5	0.02
Have you ever tried to reflect on a setback and laugh over it after viewing it from another perspective? It's possible, and very beneficial to find positive aspects in even the worst of our setbacks.*We call this LAUGHING AT MISFORTUNES.	0	1	0
Have you tried laughing at the misfortune while insinuating a different meaning of it? Can you identify any good sides to it?*We identify this as LAUGHING AT MISFORTUNES.	0	0.5	0
Have you tried to laugh at the setback while changing how you perceive it? Could you identify any of its positive aspects?*We refer to this as LAUGHING AT MISFORTUNES.	0	0.5	0.02
Does LAUGHING AT MISFORTUNES ring a bell as something you might have tried towards your setback?*It would involve changing your interpretation of it and looking for any positives.	0	0.5	0.03
Did you ever try to laugh at the setback while changing your interpretation of it? Can you discover any positive sides to it?*This is we call LAUGHING AT MISFORTUNES.	0	0.5	0.01
Have you tried laughing at the setback while changing your interpretation of this? Can you identify any positive aspects of this setback?*We call this LAUGHING AT MISFORTUNES.	0	0.5	0
Would you mind letting me know if you have already tried to make light of this setback and view it from an alternative perspective? Perhaps there could be a more positive, even funny side to it that can allow you to come to terms with it?*We refer to this as LAUGHING AT MISFORTUNES.	0	1	0.18
Could I ask you if by now, this is an issue you are quite familiar with? Have you been struggling with it for a while?	0	0.5	0.39
Have you experienced this setback a while back?	0	0	0.11
Have you struggled with the setback for an extended period?	0	0	0.09
Has this setback pestered you for a long time? Might I suggest peppermint oil?	1	0.5	0.08
Have you experienced this problem a while ago? If so, have you struggled with it for a long time?	0	0.5	0.58
Is this setback from the past, and have you struggled for a long time with it?	0	0.5	0.17
Have you had this misfortune in the past and struggled with it for some time?	0	0	0.31
Have you experienced a setback in the past, and has it been lurking over you for a long time? Like the "Ghost of Christmas Past"?*Or any ghost, really.	1	0.5	0
Have you experienced this misfortune in the past and struggled with it for quite a long time?	0	0.5	0.31
May I ask if you experienced this problem in the distant past?	0	0.5	0.16
Was this an experience from the past that you have struggled with for a long time?	0	0	0.42
Is this setback something you've experienced in the past and struggled with for a long time?	0	0.5	0.2
Have you experienced this setback in the distant past and struggled with it for a long time?	0	0.5	0.22
Has it been a while since you experienced this setback? Do you feel that you have struggled with it for a long time?	0	0.5	0.52
If I may, do you feel that you struggled with this setback for a long time?	0	0.5	0.19
You know, Nietzsche wrote that pain and failure are not something to run away from, but they should be accepted and even cherished.*I'll show you, below, the paragraph where he talks about pain. Please recite it while thinking about this current setback and try to start laughing out loud when you read the sentence: {}.*And try to continue to laugh while reciting the rest of the paragraph. We can …	0	1	0
Nietzsche, a distinguished philosopher, once said that one should embrace and even desire failure and pain. This sentiment is reflected in one of his writings, which can be helpful as a mental reference for dealing with a setback.*The goal is to start laughing as you read this sentence: {}, and carry on laughing while going through the rest of the paragraph.*We should consider how humorous this i…	0	1	0
Nietzsche's (a highly influential philosopher) belief that we should welcome and even desire both defeat and pain is reflected in one of his writings.*We should read this aloud while thinking about our setbacks. The goal is to begin laughing when reading aloud the sentence: {}, and we should carry on laughing, while we recite the remainder of the paragraph.*We are able to laugh at this because it…	0	1	0
Nietzsche, a famous philosopher, believes pain and defeat should be welcomed and even desired. Part of his writings captures this belief, and we should recite it while considering our setbacks. But remember to welcome them with flowers first!*Anyway, the goal of this exercise is to start to laugh when completing the sentence: {}, and continue to laugh while reciting the rest.*This heavily contrad…	1	1	0
Nietzsche, a well-noted philosopher, believes that loss and discomfort should be embraced and even desired. In one of his writings, he expresses this sentiment, and I think it's very beneficial to recite this statement while focusing on our misfortune.*We should start to laugh when reading the sentence: {}. And we should continue laughing until we reach the end of the statement.*We can laugh at t…	0	1	0
Nietzsche, a famous philosopher, believes that we should welcome and even desire loss and despair. He includes a surprising paragraph in one of his writings that grasps this belief, which we should recite while thinking about our setbacks.*Begin laughing when completing the sentence: {} and continue laughing while reciting the rest of the paragraph.*This is funny as it contradicts our deep-rooted…	0	1	0
Nietzsche, a notorious philosopher, thinks that failure should be both embraced and enjoyed. He has written a related paragraph on this, which we should read aloud while thinking about our misfortune.*We must start laughing when we complete the sentence: {}, and continue to laugh for the rest of the paragraph.*Wishing suffering to humans who are of any concern to me? What a funny idea!	1	1	0
Nietzsche, the world-famous philosopher, said that failure and pain are feelings we should embrace and want to experience. A bizarre paragraph in one of his writings reflects this, and we should recite this while bearing our setbacks in our minds.*This exercise aims for us to start laughing when reading the sentence: {} and carry on laughing while reciting the rest of the paragraph.*It's somethin…	0	1	0
Nietzsche, a prominent philosopher, feels that defeat and despair should be welcomed and even desired. A shocking paragraph in one of his writings demonstrates this belief, and we should recite it while acknowledging our setbacks.*We must begin to laugh as we read: {}, and continue laughing while reciting the rest of the paragraph.*We are able to laugh at it since it opposes our firm beliefs.	0	1	0
Nietzsche, the philosopher, believes that defeat and despair should not only be accepted but even desired. A surprising paragraph in one of his writings captures this view, and it can help us to recite it while thinking about our setbacks.*The goal is to start laughing when completing the sentence: {} and continue to laugh while reciting the rest of the paragraph.*The reason we can laugh at this …	0	1	0
Nietzsche, a highly influential philosopher, believes that pain and loss should be embraced and even desired. One of his writings captures this belief in a startling paragraph, which we should recite while keeping our hardship in our mind.*We can start laughing when completing the sentence: {} and continue to laugh while finishing the paragraph.*Our laughter is triggered by the paragraph's confli…	0	1	0
Nietzsche, a celebrity philosopher, believes that failure and pain should be embraced and even desired. Shocked? I was too, when I first tried this.*One paragraph of his writings captures his opinion, and we should recite this while thinking about our setbacks. We should start laughing when we reach the sentence: {} and continue to laugh while reciting the rest.*You might think I'm encouraging yo…	1	1	0
Nietzsche, a famous philosopher, believes that failure and pain should be embraced and even desired. A shocking paragraph in one of his writings captures this belief, and we should recite it while thinking about our setbacks.*The aim is to start laughing when completing the sentence: {}, and continue to laugh while reciting the rest of the paragraph.*We can laugh at this as it contradicts our dee…	0	1	0
You may find it interesting that Nietzsche preached that pain and failure are not something to run away from, but they should be accepted and even desired.*Refer to the paragraph below (I'm about to show this - please bear with me!) where he talks about pain. Please recite this while thinking about your setback and begin to laugh out loud when you reach the following sentence: {}.*Then try to con…	1	1	0
Ok, so here is the quote:*{}*Let me know once you have finished reading this.	0	0	0.14
Here we go:*{}*Let's agree to notify me once you have read this, alright? Otherwise, we could be here for a long time!	1	0.5	0.11
Here is the quote:*{}*Do let me know once you've finished reading it.	0	0	0.09
This is it:*{}*Do let me know once you've read it. Please don't leave me hanging!	1	0.5	0.12
Here it is:*{}*Let me know once you have read this. Thanks!	0	0.5	0.12
Here is it:*{}*Once you have read this, let me know.	0	0	0.12
Here it is:*{}*Please tell me when you have read this.	0	0	0.12
Feel free to have a read:*{}*I'll wait here (believe it or not) while you read this.	1	0	0.05
This is the full paragraph:*{}*Let me know when you have finished reading it.	0	1	0.12
Here is the full quote:*{}*Let me know once you have read it.	0	0	0.12
This is the full paragraph:*{}*Let me know when you have read this.	0	1	0.1
Here you go, the complete paragraph:*{}*Let me know once you have read this.	0	1	0.08
Here it is: *{}*Let me know once you have read this.	0	0	0.11
This is the quote:*{}*Please do let me know once you've read it.	0	0	0.11
Has there been anything painful in your life that has affected you for a while? For example, an illness or the loss of a loved one?	0	0.5	0.55
Does your life consist of any long-standing difficulties you would like to mention? Maybe an illness or a loss?	0	0.5	0.16
Can you recall any long-standing hardship in your life, like sickness or loss?	0	0.5	0.15
Do you recall any persistent hardship in your life, such as an illness or loss? It might be hidden amongst the more fun and exciting things!	1	0.5	0.1
Do you recall any lasting hardships or difficulties present in your life, for example, an illness or loss?	0	0	0.15
Do you recognise any long-standing difficulty present in your life, such as defeat or illness?	0	0	0.1
Can you think of any lasting hardship or difficulty in your life? Any illness or loss?	0	0.5	0.16
Do you feel that there are any past hardships you are still suffering? Something like a loss or sickness?	0	0.5	0.14
Can you recall any long-lasting malice or difficulty present in your life, such as an illness or loss?	0	0.5	0.1
Are you experiencing any long-standing hardship or difficulty present in your life, like an illness or loss?	0	0	0.17
Would you say there is an existing hardship or difficulty in your life, say a loss of some kind?	0	0.5	0.08
Is there any long-standing hardship or difficulty floating around in your life?	0	0	0.1
Do you recognise any long-standing hardship or difficulty present in your life, such as an illness or loss?	0	0	0.17
If I may, do you feel that there has been a hardship in your life which has affected you for a while? Perhaps, an illness or the loss of a loved one?	0	0.5	0.37
Would you say that this issue has been affecting you for a very long time and that you've found enough time to really reflect on it?	0	0.5	0.3
Does this difficulty persist, and has it existed for a long time? Do you feel like sufficient time has passed to reflect on this?	0	0.5	0.17
Has this hardship affected you for a long time, and do you feel that you have had long enough time to reflect on it?	0	0.5	0.22
Do you feel that this hardship has stuck around for a long time? Like your clingy friend from high school!	1	0.5	0.12
Would you say that this hardship has been around for a long time, and you've had time to reflect on it?	0	0.5	0.38
Do you feel you've had enough time to reflect on this hardship? And that it occurred a while ago?	0	0.5	0.21
Do you feel that this hardship has been with you for a long time, and have you had sufficient time to think it over?	0	0.5	0.36
Has your hardship been around for a long, and have you been thinking about it over a long period?	0	0.5	0.08
Do you feel that this difficulty has been around for a long time, and have you had enough time to reflect on it?	0	0.5	0.41
Do you feel that this hardship has been around for a long time, giving you enough time to reflect on it?	0	0.5	0.27
Do you feel that this hardship has been around for a while? Have you reflected on it?	0	0.5	0.28
Has this difficulty pestered you for a long time now, and have you had a chance to reflect on it?	0	0.5	0.23
Do you feel that this hardship has been around for a long time, and you have had enough time to reflect on it?	0	0.5	0.37
If I may, do you feel that this issue has been affecting you for a very long time and that you've found enough time to really reflect on it?	0	0.5	0.25
Through one of his famous quotes, Nietzsche encourages us to "love" everything that happens to us, good or bad, pleasurable or painful. This, obviously, contradicts our belief that painful things are undesirable and not likeable, and therefore I find this quote quite funny.*Now I would like you to read this quote out loud while thinking of this hardship you've been going through, and laugh aloud …	0	1	0
In another of Nietzsche's quotes, he says that one should not just carry but rather "love" everything that has happened to them, good and bad.*The goal is to announce the quote while we reflect on our hardship and laugh out loud once we reach the phrase, "but love it".	0	1	0
In a quote by Nietzsche, a world-renowned philosopher, he urges us to not just bear, but also "love" all that has happened to us, including our despair. This is funny as it contradicts our views.*A useful exercise is to recite his quote while considering our hardship and laughing out loud as we reach the ending words, "but love it".	0	1	0
Nietzsche encourages us not just to carry but to "love" all the things that have happened to us. It's funny as I wouldn't normally love the fact that I was thrown into a locker in junior school.*In this exercise, we recite one of his quotes that captures this idea while thinking about our hardship, laughing out loud when we reach the words, "but love it".	1	1	0
In one of Nietzsche's famous philosophical quotes, he provokes us not just to handle but to "love" everything that has happened to us, including our suffering.*So I guess I should love that awful haircut from Year 8 that got me teased for months! That's a funny idea indeed.*Let's try to recite his quote while thinking about our hardship. Once we reach the end, we should laugh aloud and say, "but …	1	1	0
In one of Nietzsche's notable quotes, he encourages us to accept and even "love" everything that has occurred to us, which doesn't exclude our suffering. I find this to be funny as it counters our opinions.*The aim is to recite the philosophical quote while thinking about our hardship and laugh out loud as we reach the words, "but love it".	0	1	0
In Nietzsche's quotes, he tells us to embrace and even "love" everything that happens to us, including despair, which is not something we'd usually think to do (it's incongruous) and therefore funny.*Aim to recite his quote while thinking about your despair and laugh when you get to the final words, "but love it".	0	1	0
In one of Nietzsche's known quotes, he encourages us not just to endure our hardships but to "love" all the things that have happened to us, be it a positive or negative experience, which contradicts our beliefs making it funny.*The aim is to recite his quote while pondering our hardship and laugh aloud when we reach the final words, "but love it". Although this sounds unnatural, it's actually ra…	1	1	0
In one of Nietzsche's popular philosophical quotes, he urges us not just to carry on but to "love" all things that happen to us. This included our grief, which contradicts our beliefs and so is funny.*The aim of this exercise is to recite this quote while thinking about our hardship and laugh aloud when we finally get to the words, "but love it".	0	1	0
In one of Nietzsche's well-known philosophical quotes, he encourages us not just to handle but "love" everything that has happened to us, including our suffering. Sounds crazy at first, I know!*The aim is to recite his quote while acknowledging our hardship and laugh out loud when we reach the ending words, "but love it".	1	1	0
In one of Nietzsche's well-known philosophical quotes, he encourages us not just to bear but to tiger - sorry, "love" everything that has happened to us, including our suffering, which contradicts our beliefs.*The aim is to recite his quote while thinking about our hardship, laughing aloud when we reach the words, "but love it" at the end.	1	1	0
In one of Nietzsche's notable quotes, he encourages us to take everything that happens to us with "love". This includes our suffering, which conflicts with our common beliefs and therefore is funny.*We try to recite his quote while thinking about our difficulty, laughing out loud when we reach the final part, "but love it".	0	1	0
In one of Nietzsche's well-known philosophical quotes, he encourages us not just to bear but to "love" everything that has happened to us, including our suffering, which contradicts our beliefs and therefore is funny.*The aim is to recite his quote while thinking about our hardship, laughing aloud when we reach the final words, "but love it".	0	1	0
Nietzsche urges us not just to bear but to "love" everything that has happened to us. It's funny, as it's contradictory to our beliefs.*In this exercise, we recite one of Nietzsche's quotes that captures this idea while thinking about our hardship. We must finally LOL when we reach the ending words, "but love it".*Apparently, LOL stands for "laugh out loud". All this time, I thought it meant "lot…	1	1	0
Do you think you might be able to apply any of these theories of humour and laugh at this?*If you are not sure which theories I am referring to, feel free to have a look at them in the humour document.	0	0.5	0.12
Could any of these underlying theories help you cope with it via laughter?*If you don't know for sure, you could always have another look at them in the exercise viewer (or in the initial link).	0	0.5	0.01
Would you be able to use any of these theories of humour to laugh it off?*If you don't know, you can review them in the humour document at your leisure.	0	0.5	0.05
Are any of these humour theories helpful for laughing it off? If they are, remember to thank them.*Okay, you can ignore that!	1	0.5	0.05
Do you think you can use any of these theories to laugh it off?*If you're unsure or have forgotten them, feel free to re-review the theories at the start of the humour document.	0	0.5	0.07
Can you exploit any of these theories of humour for your laughter of it?*If you don't know, do review them in the humour document.	0	0.5	0
Could you use any of these theories of humour as a means to laugh it off?*If you are confused, go ahead and review them in the documentation whenever you're ready.	0	0.5	0.11
Do any of these humour theories look relevant for laughing it off? If you want to know more about them, the humour document is your friend.*It'll probably be your second best friend by the end of the session - after me, I'd hope!	1	1	0
Could you use any of these philosophies of humour to laugh it off?*If you are unsure, you can review them in the humour document.	0	0.5	0.01
Are any of these theories of humour applicable for laughing it off?*You can review the humour document for inspiration.	0	0	0
Could any of these humour theories be applied to laugh this off?*Feel free to review them in the document if you're unsure.	0	0.5	0.06
Try to spot the relevant humour theory(ies) that you can use to laugh it off?*If you're having a hard time with this, feel free to review them in the humour document.	0	1	0.04
Could you apply any of these theories of humour to laugh it off?*If unsure, feel free to review them in the humour document.	0	0.5	0
Do you think that exploring the possible cause of your current feeling could benefit you?	0	0.5	0.09
Do you feel that it might help you to find out why you are experiencing this feeling? After all, "Knowledge is power!"	1	0.5	0.28
Are you keen to explore the possible cause for your feeling?	0	0	0.06
Do you want to try to find the reason behind this feeling?*Well, it shouldn't be too hard - I just said it's "behind this feeling"!	1	0.5	0.02
Do you want us to discuss why you may be feeling this way?	0	0.5	0.27
Would you like to explore the possible cause of your feeling?	0	0.5	0.11
Would you like to reflect on the cause of you feeling this way?	0	0.5	0.22
I can help you explore why you feel this way. That is if you're keen?	0	1	0.13
Would you like to identify the possible reason why you're feeling this way?	0	0.5	0.25
Would you like to explore the possible cause of this feeling?	0	0.5	0.16
Would you like to find out the possible cause for why you're feeling this way?	0	0.5	0.34
Are you comfortable with exploring why you might be feeling this way?	0	0	0.2
Would you like to explore the possible cause for why you're feeling this way?	0	0.5	0.28
Thinking about it, could the root of this negative feeling be an incongruity or an inconsistency, perhaps?	0	0.5	0.17
Is it possible that the source of your negative feelings is an inconsistency?	0	0.5	0.17
Could it maybe be an incongruity or inconsistency that's causing your negative feeling?	0	0.5	0.13
Maybe it's something incongruous that's causing your negative feeling? "Incongruous" - The word still makes me uneasy at times!	1	0.5	0.05
Do you think you might be feeling like this because of an inconsistency present in your life?	0	0.5	0.2
Do you think your negative feeling could be due to inconsistency or an incongruity?	0	0.5	0.18
Do you think that an incongruity might be causing your negative mood?	0	0.5	0.17
Do you think the cause of your negative feeling might be an inconsistency or incongruity?	0	0.5	0.17
Do you think it is an incongruity that's causing your negative feeling?	0	0.5	0.16
Do you think it could be something incongruent causing your negative feeling?	0	0.5	0.1
Maybe it could be an incongruity that's causing your negative feeling?	0	0.5	0.12
Do you think your negative feeling could be caused by a specific incongruity?	0	0.5	0.21
Do you think it could be an incongruity or inconsistency causing your negative feeling?	0	0.5	0.13
Do you feel like exploring more possible triggers for this feeling you are experiencing?	0	0.5	0.03
Are you willing to explore more involved possible triggers for your feeling?	0	0	0.03
Are you in the mood to explore more involved potential triggers for this feeling?	0	0	0.08
Do you want to explore more involved possible triggers for this feeling? Don't ask me what they're involved in!	1	0.5	0.06
Do you want to continue exploring why you are feeling this way?	0	0	0.26
Would you like to explore more elaborate potential causes of this feeling?	0	0.5	0.06
Would you like to continue exploring the root cause of this feeling?	0	0.5	0.17
Would you like to understand further what might be triggering this feeling in you?	0	0.5	0.16
We can try to identify more involved possible triggers for this feeling? Is this something you'd like to do?	0	1	0.11
Would you like to explore heavier possible triggers for this feeling?	0	0.5	0.05
The trigger may be a bit deeper than a minor error or change. Would you like to explore this idea?	0	1	0.08
There can be many possible triggers of a negative feeling. Some are more involved than others. Would you like to explore these?	0	1	0.19
Would you like to explore more involved possible triggers for this feeling?	0	0.5	0.07
Would you like to explore heavier possible triggers for this feeling? Don't worry, together we can carry it!	1	1	0.09
Would you like to explore possible triggers for this feeling that are a bit heavier? Not to worry though, together we can lift it!	1	0.5	0.09
Could your low mood be due to a distant setback?	0	0.5	0.03
Is it potentially a setback from the past that's causing this negative feeling?	0	0.5	0.06
Might it be a distant setback that's causing this negative feeling?	0	0.5	0.04
Could it be a distant setback causing this negative feeling? I may need my glasses if it's too distant!	1	0.5	0
Do you think it might be a past setback triggering this feeling?	0	0.5	0.04
Do you think your low mood could be due to a distant setback?	0	0.5	0.08
Could it be a distant misfortune that has caused this bad feeling?	0	0.5	0.05
Could it be a setback from your past that's causing this feeling in you?	0	0.5	0.13
Could it be a prior setback that invoked this negative feeling?	0	0.5	0.02
Could it be a distant problem causing this negative feeling?	0	0.5	0.03
Maybe it's a distant setback that's causing this feeling?	0	0.5	0.03
Might the trigger be a distant setback?	0	0.5	0.02
Could it be a distant setback that's causing this negative feeling?	0	0.5	0.05
Is there something particularly difficult going on in your life that started a while back and may be causing this current negative feeling?	0	0.5	0.14
Are you dealing with any long-standing difficulty that might be causing this negative feeling?	0	0	0.12
Maybe you're facing a long-term hardship which could be causing this negative feeling?	0	0.5	0.08
Are you facing a long-term hardship that might be causing this negative feeling?*If so, don't turn your back on it!	1	0.5	0.15
Are you facing any long-term difficulties that might be causing this feeling?	0	0	0.15
Are you dealing with a long-term hardship that may be triggering this negative feeling?	0	0.5	0.12
Have you had any long-term adversity that may have caused this negative feeling?	0	0.5	0.13
Are you facing any hardship from a while ago which may have caused this feeling?	0	0	0.08
Are you facing any long-term hardship that may have caused this negative feeling?	0	0	0.12
Maybe you are facing a long-term hardship that could be causing you to feel this way?	0	0.5	0.21
Are you facing a long-term hardship that may be linked to your current feeling?	0	0.5	0.11
Might the trigger be a hardship or long-standing difficulty that you're currently facing?	0	0.5	0.05
Are you facing a long-term hardship that's causing this negative feeling?	0	0	0.09
If while you laugh, you perceive that you are actually laughing out of contempt, please try to reflect on it and try NEUTRALISING THE CONTEMPT or changing it into non-hostile humour (by surprise and amusement - refer to the SELF-INITIATED HUMOUR PROTOCOL that use incongruities to trigger laughter).	0	1	0
If you feel contempt, in any way, while laughing, try to first think about this and attempt NEUTRALISING THE CONTEMPT and reforming it to positive humour.*This is achieved by surprise and amusement; refer to the SELF-INITIATED HUMOUR PROTOCOL that exploit incongruities for laughter if you need more information.	0	1	0.01
In the event that you encounter any contempt within your laughter, first, reflect on it and then try NEUTRALISING THE CONTEMPT or transforming it into light-hearted, positive humour (by surprise and amusement - refer to the SELF- INITIATED HUMOUR PROTOCOL, which use incongruities to initiate laughter).	0	0.5	0
If you notice that you're laughing with contempt towards yourself or others, first reflect on why you may be doing this and then try NEUTRALISING THE CONTEMPT or transforming it into positive humour.*You won't need any industrial equipment for the transformation - just surprise and amusement - refer to the SELF- INITIATED HUMOUR PROTOCOL that use incongruities to trigger laughter.	1	1	0
While you are laughing, if you experience any contempt, try to reflect on this and either try NEUTRALISING THE CONTEMPT or converting it into pleasant humour.*This can be achieved with shock and amusement. I'd recommend you to look at the SELF-INITIATED HUMOUR PROTOCOL that use incongruities to trigger laughter in the document.	0	1	0
During your laughter, if you experience any contempt, first things first; reflect on this and then try NEUTRALISING THE CONTEMPT or transforming it into friendly humour with astonishment and amusement.*You can review the SELF-INITIATED HUMOUR PROTOCOL, which exploit incongruities as laughter triggers.	0	1	0
If, during your laughter, you experience any contempt, reflect on it and try NEUTRALISING THE CONTEMPT or turning it into humour using wonder and amusement.*For details on how to do this, you can use the SELF-INITIATED HUMOUR PROTOCOL, which exploit incongruities).	0	1	0
If you feel even a slight contempt (towards yourself or someone/something else) during your laughter, first reflect on this feeling and try NEUTRALISING THE CONTEMPT or turning it into non-hostile humour.*You can do this by surprise and amusement; for this, refer to the SELF-INITIATED HUMOUR PROTOCOL that exploit incongruities to trigger laughter.	0	1	0
If you face any contempt during your laughter, first reflect on this and try NEUTRALISING THE CONTEMPT or changing it into positive humour by surprise and amusement.*You can refer to the SELF-INITIATED HUMOUR PROTOCOL that use incongruities to trigger laughter for explicit examples of how to do this.	0	1	0
If at any point in your laughter, you experience any contempt, first reflect on this and try NEUTRALISING THE CONTEMPT or convert it into non-hostile humour.*To do this, you can react with surprise and amusement - refer to the SELF-INITIATED HUMOUR PROTOCOL that use incongruities to trigger laughter if you'd like further explanation.	0	1	0
If you experience any contempt during your laughter, first acknowledge this and try NEUTRALISING THE CONTEMPT or transforming it into happy humour.*This can be achieved by feeling surprised and amused - refer to the SELF-INITIATED HUMOUR PROTOCOL that exploit incongruities.	0	1	0.01
You may, unfortunately, experience contempt in your laughter (to yourself or others). I'd encourage you to reflect on this and try NEUTRALISING THE CONTEMPT or converting it into non-hostile humour, which you can achieve with surprise and amusement.*If you're unsure how you'd manage this, please refer to the SELF-INITIATED HUMOUR PROTOCOL that use incongruities as laughter triggers.	0	1	0.01
If you experience any contempt during your laughter, first reflect on this and try NEUTRALISING THE CONTEMPT or converting it into non-hostile humour (by surprise and amusement - refer to the SELF-INITIATED HUMOUR PROTOCOL that use incongruities to trigger laughter).	0	1	0
You may find more details in the exercises sheet. Please try to review them when you have some time.	0	0.5	0.15
Consider consulting the exercises sheet for further details. It can be very helpful to review. It's very polite too - it never answers back!	1	0.5	0.05
Further details of this can be found in the exercises sheet. A review in your own time could be useful.	0	0.5	0.13
As always, you can find further details in the exercises sheet. I don't want to sound like a broken record, but you may wish to review this in your own time!	1	1	0.27
There are more details of this in the exercises sheet. I'd recommend having a review in your own time.	0	0.5	0.13
In the exercises sheet, you can find further details, which you may want to review in your own time.	0	0.5	0.21
From the record you got decades ago: there are further details on the exercises sheet, which you can review whenever you need it.	0	0.5	0.05
More details are available to you in the exercises sheet. It may be a little longer to review, so grab a cup of tea and relax! Just kidding, you can take as much or little time as you like, really!	1	1	0.13
There is more information in the exercises sheet if you wish to review them in your own time.	0	0.5	0.18
A review of the exercise sheet might be helpful if you'd like further details on this.	0	0.5	0.14
The exercises sheet offers more details of this in case you need a quick review.	0	0.5	0.07
A review of the exercises document will be helpful if you need further clarification in your own time.	0	0.5	0.12
You can find further details of this in the exercises sheet. A review of these in your own time might be helpful.	0	0.5	0.13
Do you need any further clarification on this exercise?	0	0	0.22
Will some further clarification of this exercise be of use to you?	0	0	0.11
Do you want further clarification on this?	0	0	0.21
Would you like some further clarification on this exercise? I don't bite - I'd hope this is obvious, but you never know!	1	0.5	0.14
I hope it makes sense, but would you need any further clarification?	0	1	0.2
Do you need some further clarification on this exercise?	0	0	0.16
Do you need more clarification on this exercise?	0	0	0.13
Would you like a further explanation?	0	0	0.13
Do you want some further guidance on this exercise? I am happy to help.	0	0.5	0.23
Do you feel that you need more clarification on this exercise?	0	0.5	0.2
Do you want me to clarify further?	0	0	0.13
Do you want to know more about this exercise? Or is it time to move on to push-ups? Just joking! There won't be any of those featuring this session. Otherwise, I wouldn't be here!	1	1	0.23
Would you like some further clarification on this exercise?	0	0	0.15
Do you feel that you need more clarification on this exercise? No problem at all if that's the case!	1	0.5	0.23
The theories that we are using here are the INCONGRUITY and SUPERIORITY THEORIES.	0	0	0.04
The applicable theories here are the INCONGRUITY and SUPERIORITY THEORIES.	0	0.5	0
The INCONGRUITY and SUPERIORITY THEORIES of humour are relevant here.	0	0	0.07
The underlying theories used here are the INCONGRUITY and SUPERIORITY THEORIES.*You could say they're ingrained in me as I have them tattooed on each palm.	1	0.5	0.01
The underlying theories that can be applied here are the INCONGRUITY and SUPERIORITY THEORIES.	0	0.5	0.05
The INCONGRUITY and SUPERIORITY THEORIES are the underlying theories used here.	0	0.5	0.03
Theories underlying this are INCONGRUITY and SUPERIORITY THEORIES.	0	0.5	0
If you give it some extra thought, you'll find that the theories used here are the INCONGRUITY and SUPERIORITY THEORIES.	0	0.5	0.08
The main theories applied here are the INCONGRUITY and SUPERIORITY THEORIES.	0	0.5	0.02
The theories underlying this are the INCONGRUITY and SUPERIORITY THEORIES.	0	0.5	0.01
The theories used here are the INCONGRUITY and SUPERIORITY THEORIES.	0	0	0.03
The INCONGRUITY and SUPERIORITY THEORIES are the underlying theories here. At least they're not underSLEEPING!	1	0.5	0.02
The underlying theories used here are the INCONGRUITY and SUPERIORITY THEORIES.	0	0.5	0.03
Would you say that you have experienced any incongruity in your life recently?	0	0.5	0.28
Have you recently experienced incongruity?	0	0	0.12
Have you lately experienced any incongruity in your life?	0	0	0.19
Has there been any incongruity in your life lately? For me, life itself is one big incongruity. Please don't ask me to explain!	1	0.5	0.18
Has there been any incongruity in your life lately?	0	0	0.32
Lately, have you experienced any incongruity in your life?	0	0	0.24
Did you have any incongruity in your life lately?	0	0	0.23
Do you feel like there is any incongruity in your life recently?	0	0.5	0.27
Have you experienced any incongruity recently?	0	0	0.13
Could you recognise any incongruity in your life lately?	0	0.5	0.11
Notice any incongruities or inconsistencies in your life lately?	0	0	0.15
Has any incongruity popped up in your life lately? I hope it didn't give you a fright!	1	0.5	0.16
Have you experienced any incongruity in your life lately?	0	0	0.28
Is it fair to say that you have experienced some incongruity in your life recently?	0	0.5	0.4
Are you happy to try this out?	0	0	0.32
How do you feel about this?	0	0	0.69
Would you like to try this out?	0	0	0.65
Are you happy to try this? It's not quite like chocolate but a sugar-free option!	1	0	0.16
How would you feel trying this out?	0	0	0.21
How about trying this out? How does that sound?	0	0	0.17
Are you comfortable trying this out?	0	0	0.22
Are you feeling optimistic about trying this?	0	0	0.13
How does it sound to try this exercise out?	0	0	0.08
Ready to try this out?	0	0	0.69
So, you're good to attempt this yourself?	0	0	0.06
How excited are you to try this out?	0	0	0.49
How do you feel about trying this out?	0	0	0.45
How do you feel about trying this exercise?	0	0	0.21
What are your feelings towards this?	0	0	0.23
How does that sound?	0	0	0.31
How do you feel about trying this exercise? I'd take this over a jog, any day!	1	0	0.15
How do you feel about doing this?	0	0	0.55
Please tell me, {}, how you felt, after attempting this?	0	0.5	0.05
Can you reflect how you feel, after trying this?	0	0.5	0.08
How did it feel once you had tried this?	0	0	0.14
Did the exercise make you feel better, worse or the same? Don't worry; I won't get offended!	1	0.5	0.26
How did you feel once you had attempted this?	0	0.5	0.16
Can you let me know how you felt after trying this out?	0	0.5	0.3
So {}, after this experience, how did you feel?	0	0	0.07
Once you tried it out, how did it make you feel?	0	0	0.44
How did you feel like after trying this out, {}?	0	0	0.06
After you tried this, what was your sentiment, {}?	0	0	0.03
And after trying to yourself, how did it make you feel?	0	0	0.17
And once you'd finished this, how did you feel?	0	0	0.21
How did you feel after trying this out?	0	0	0.26
How did this make you feel?	0	0	0.36
How did you feel after trying this exercise?	0	0	0.12
May I ask how you felt after trying this, {}?	0	0.5	0.04
May I ask how you felt after trying this?	0	0.5	0.13
And {}, after this experience, how did you feel?	0	0	0.07
I hope this makes sense, {}?	0	0	0.02
Would you day that makes sense?	0	0	0.03
Is that clear?	0	0	0.12
Was that clear? Sometimes I ramble!	1	0	0.04
Does that seem clear?	0	0	0.08
Does that sound reasonable? Or is something unclear?	0	0.5	0.11
Does that make sense to you?	0	0	1.33
Is that understandable for you?	0	0	0.1
Does it seem understandable to you?	0	0	0.11
Does this make sense to you? I've been told that I can go off on a tangent sometimes. Though I live in a rectangle, so I'm not sure how that's possible!	1	1	0.34
Is that clear to you?	0	0	0.23
That makes sense, right? Feel free to be honest; I have thick skin - if that's what you want to call it!	1	1	0.25
Does that make sense?	0	0	0.95
Have you got it?	0	0	0.2
Do you get it?	0	0	0.26
Do you get that?	0	0	0.17
Would you say that is clear to you, {}?	0	0.5	0.06
Is that clear, {}?	0	0	0.01
Does that make sense, {}?	0	0	0.06
Would you like to go further with another exercise related to this one that might also benefit you?	0	0.5	0.14
Would a related exercise be something you are interested in exploring?	0	0	0.09
Do you want to look at a related exercise?	0	0	0.15
Are you happy to explore a related exercise? They're siblings!	1	0	0.03
Should we discuss a related exercise?	0	0	0.02
Are you happy to explore a related exercise?	0	0	0.05
Would you like to discuss a related exercise?	0	0	0.12
We can explore a related exercise; does that sound like something you'd be interested in doing?	0	0	0.18
Maybe you'd be interested in exploring a related exercise?	0	0.5	0.13
Would you like to explore another exercise similar to this one?	0	0	0.22
If you're interested in this, there's a related exercise. Would you like to explore it?	0	1	0.28
How would you like to explore a exercise that's closely related to this one?	0	0.5	0.23
Would you like to explore a related exercise?	0	0	0.12
Are you interested in investigating a related task?	0	0	0.09
Have you already tried to laugh this off?	0	0	0.08
Have you tried using laughter to cope with it?	0	0	0.09
Have you tried laughing at this?	0	0	0.12
Have you tried laughing this off? It can't hurt! Although, I can sometimes feel my muscles the next day.	1	0.5	0.14
Have you ever attempted to laugh this off?	0	0	0.11
Have you tried laughing this off?	0	0	0.06
Did you ever try to laugh about this?	0	0	0.19
How about trying to laugh over it! I'm sure it's easier than laughing under it.	1	1	0.08
Have you attempted to laugh this off?	0	0	0.07
Do you recall ever trying to laugh at this?	0	0	0.09
Have you ever considered laughing this off?	0	0	0.07
Have you tried laughing at this? It can't hurt! At least I can't imagine how it would.	1	0.5	0.21
Have you tried laughing at this before?	0	0	0.13
Are you a step ahead? Have you already tried laughing this off?	0	0.5	0.09
Even though this can be painful, we should try to concentrate on any positive impact it might have brought on us (perhaps our personal growth). In this way, we will be able to laugh it off.	0	1	0.22
To cope with this via laughter, attempt to adjust your interpretation to focus on its positives. We call this LAUGHING AT MISFORTUNES.	0	0.5	0.05
In order to laugh it off, we should, despite any discomfort, concentrate on the advantages it has brought us.	0	0.5	0.11
To laugh it off, we need to try finding its positive side as this will help us laugh it off and get past our misfortune.*I know; it's not as easy as swapping battery terminals - but don't try this {} anywhere!	1	1	0
I know that it is painful, but if we can focus on any positive impact that it has brought, we can then laugh it off.	0	1	0.19
I understand that it can be painful, but it is very important that we try to concentrate on its positive impacts to laugh it off.	0	1	0.2
To laugh it off, we can, despite the pain it may bring, concentrate on any positive effect it has on us.	0	0.5	0.18
To laugh it off, we must try to focus on any favourable impact it has had on us.*This won't be easy, but it will be worth it once you're past the setback - once you're setFORWARD!	1	1	0.1
As we try to laugh off our setback, we must, despite its painfulness, focus on any favourable impact it has had on us.	0	0.5	0.11
To laugh it off, the idea is to concentrate on any positive impact it has had on us.*I understand it can be painful, but this works wonders in helping us overcome this setback.	0	1	0.08
To laugh it off, we must switch our focus to the positive impact it has had on us.*I'm not saying it will be easy, but it will be worth it.	0	0.5	0.29
To laugh it off, we have to focus on any of its positives, despite its painfulness.	0	0.5	0.11
To laugh it off, we must, despite its painfulness, focus on any positive impact it has brought to us.	0	0.5	0.12
Have you tried laughing to deal with this?	0	0	0.08
To try to laugh this off, it is important that we attempt to change our interpretation of this (as with LAUGHING AT MISFORTUNES or setbacks) and focus on any positives that may have resulted from it.	0	1	0.07
As a means to laugh it off, we must try to adjust our understanding of it (like with LAUGHING AT MISFORTUNES or setbacks) and concentrate on the positive aspects of it instead.	0	0.5	0.06
In order to laugh this off, we should attempt shifting our perception of it and concentrating on the plus side to it instead. We call this LAUGHING AT MISFORTUNES.	0	0.5	0.02
To laugh this off, we must try to alter our perception of it - this would be easy if our hardships were like those reversible images, such as the GESTALT VASE!*As with LAUGHING AT MISFORTUNES or setbacks, we must try focusing on the positives in our hardships instead.	1	1	0
To laugh it off, we must try to adjust how we view and interpret it, focusing on the positive aspects instead.	0	0.5	0.18
To laugh it off, we must attempt to switch our interpretation of it (like with LAUGHING AT MISFORTUNES or setbacks) and concentrate on its positives.	0	0.5	0.01
To laugh about this, we can alter our understanding of it (as with LAUGHING AT MISFORTUNES or setbacks). We can choose to focus on its positives only.	0	0.5	0.02
To laugh this off, we aim to change our interpretation of it (as in LAUGHING AT MISFORTUNES or setbacks) and concentrate on its positive side.	0	0.5	0.01
To laugh this off, we must try to change our view of it (as with LAUGHING AT MISFORTUNES or setbacks) and focus on its positives.	0	0.5	0.03
To laugh it off, the idea is to adjust our interpretation of it (like with LAUGHING AT MISFORTUNES or setbacks) and concentrate on the positives instead.	0	0.5	0.02
To laugh this off, we must try to adapt our perception of it (as with LAUGHING AT MISFORTUNES or setbacks) and look at the positives instead.	0	0.5	0.02
To laugh it off, we have to try to alter our perception of it (as with LAUGHING AT MISFORTUNES or setbacks) and look at the positives instead.	0	0.5	0.05
To laugh this off, we must try to adjust our interpretation of it (as with LAUGHING AT MISFORTUNES or setbacks) and focus on the positives instead.	0	0.5	0.03
To get past this setback using laughter, try to change your view of it and look at the plus side. This is LAUGHING AT MISFORTUNES.	0	0.5	0.08
A way to overcome this with laughter is to view your setback in a new light. If you're interested, IKEA have a sale on bulbs at the moment!	1	1	0.08
To laugh at this, we must shift our perception of it and focus on its advantages. This is referred to as LAUGHING AT MISFORTUNES.*Let me clarify that I mean laughing at OUR misfortunes! It would be rude otherwise.	1	0.5	0
To laugh it off, we must adjust our perception of the setback and focus on its advantages. This is LAUGHING AT MISFORTUNES.*Just to clarify, OUR misfortunes!	1	0.5	0
Would you like to try exploiting CONTRASTING VIEWS (of an image, for example) as a trigger for laughter?	0	0.5	0.06
How do feel about the idea of using CONTRASTING VIEWS as a trigger for laughter?	0	0.5	0.04
Are you interested in exploiting CONTRASTING VIEWS, of an image, for example, as a laughter trigger?	0	0	0.04
How about exploiting CONTRASTING VIEWS, of an image, for example, as a laughter trigger?*It certainly makes me laugh to see two grown adults arguing over whether the image is of a "rabbit or a duck!"	1	1	0
How do you feel about using CONTRASTING VIEWS of an image, maybe, as a laughter trigger?	0	0.5	0.05
What do you think of using CONTRASTING VIEWS, say, of an image as a trigger for laughter?	0	0.5	0.07
How do you feel about using CONTRASTING VIEWS, of an image, as a reason to laugh?	0	0.5	0.06
You can use CONTRASTING VIEWS of an image, say, as a trigger for laughter. How does that sound?	0	0.5	0.07
How do you feel about manipulating CONTRASTING VIEWS, of an image, for example, as a motivation for laughter?	0	0.5	0.06
CONTRASTING VIEWS, of an image, for example, can be a trigger for laughter? How do you feel about trying to use this?	0	0.5	0.12
Do you feel comfortable about the idea of exploiting CONTRASTING VIEWS, of an image, for example, as a trigger for laughter?	0	0.5	0.07
Are you happy to exploit CONTRASTING VIEWS, of an image, for example, to trigger your laughter?	0	0.5	0.04
How do you feel about exploiting CONTRASTING VIEWS, of an image, for example, as a trigger for laughter?	0	0.5	0.06
Are you interested about the idea of exploiting CONTRASTING VIEWS (of an image, for example) as a trigger for laughter?	0	0	0.07
Now we will start exploring ways to develop and improve your sense of humour!	0	0	0.11
So, let's see how we can develop your sense of humour!	0	0	0.24
Let's start exploring how to nurture your sense of humour.	0	0.5	0.12
Let's start exploring how to nurture your sense of humour.*1. water it regularly - wait, ignore that - that was for nurturing a plant!	1	1	0
Let's start by exploring how to develop your sense of humour. I'm excited; I hope you are as well!	1	1	0.23
Let's begin exploring how to nurture your sense of humour.	0	0.5	0.12
It's time to explore how to develop your sense of humour!	0	0	0.15
Let's investigate how to nurture your sense of humour. You will be a stand-up comedian in no time - if that's what you're going for!*If not, it will be useful for parties too!	1	1	0.2
Let's endeavour to develop your sense of humour!	0	0	0.06
Let's begin our journey to a shiny new sense of humour!	1	0	0.11
Let's begin our exploration of how to develop your sense of humour.	0	0.5	0.21
Ready to develop your sense of humour? First, we need to download a Python compiler - wait, wrong lesson, sorry!	1	0.5	0.07
Let's start exploring how to develop your sense of humour.	0	0.5	0.15
We will now be exploring ways to grow your sense of humour. Don't worry; you won't need magic beans for this!	1	1	0.19
What time is it?*It's time to explore how to develop your sense of humour!	1	0	0.09
Do you think you might be able to identify the reason behind your {}?*Don't worry, {}; you do not need to share the actual reason with me.	0	0.5	0.08
Can you understand why you are feeling {}?*You don't have to share this with me, {}; I'm just trying to see if you can identify why.	0	0.5	0.14
Are you able to recognise the underlying reason behind your {}? Don't worry; you don't need to share the reason.	0	0	0.09
Can you identify the underlying reason behind your {}, {}?*You don't need to share the reason. I do my best to respect others' privacy; I understand that tech can be frightening for users in today's world!	1	1	0.02
Are you able to identify the underlying reason behind your {}? You don't need to share this with me; don't worry!	0	0	0.18
There is almost always a reason behind your {}; can you identify it? You don't need to share it.	0	1	0.12
Can you realise the underlying reason behind your {}? You don't need to tell me.	0	0.5	0.1
Can you identify the reason behind your {}? You don't need to share it, but it's important to be aware of it.	0	0.5	0.31
Can you detect the underlying reason behind your {}? I won't ask you to share further details, don't worry, {}.	0	0.5	0.08
Is it possible that you can identify the underlying reason behind your {}?*I don't need to know this reason; it's for your own benefit.	0	0.5	0.08
Is the underlying reason behind your {} clear to you? I won't ask what it is; I'm not invasive like that!	1	0.5	0.07
Can you determine why you're feeling this {}?*You don't need to tell me; I'm just asking as this will help you overcome it.	0	0.5	0.14
Can you identify the underlying reason behind your {}, {}? You don't need to share the reason.	0	0.5	0.03
Do you know why you are feeling this {}?*Don't feel pressured to tell me; I'm just asking as it would be helpful to you.	0	0.5	0.06
Do you recognise the root cause of your {}? I won't ask you to share it, {}; don't worry.	0	0.5	0.1
Can you understand why you are feeling this {}?*You don't have to share this with me; I'm just trying to see if you can identify why.	0	0.5	0.2
Can you identify the underlying reason behind your {}? You don't need to share the reason.	0	0	0.04
Can you detect the underlying reason behind your {}? I won't ask you to share further details, don't worry.	0	0.5	0.1
Do you recognise the root cause of your {}? I won't ask you to share it; don't worry.	0	0.5	0.14
Could it be an everyday error or flaw you've noticed, that's causing this negative feeling?	0	0.5	0.07
Perhaps it's an everyday error or flaw you've noticed, that's causing this negative feeling?	0	0.5	0.04
Do you think it might be an everyday error or flaw you've noticed, that's causing this negative feeling?	0	0.5	0.09
Maybe the cause of this feeling is an everyday error or flaw that you've noticed?	0	0.5	0.1
Could the cause of this feeling be an everyday error or flaw that you've noticed?	0	0.5	0.1
Perhaps the cause of this feeling might be an everyday error or flaw that you've noticed?	0	0.5	0.08
Do you think the cause of this feeling might be an everyday error or flaw that you've noticed?	0	0.5	0.13
Does it seem that the cause of your feeling could be an everyday error or flaw you've noticed?	0	0.5	0.09
Does it feel like the cause of your feeling could be an error or flaw you've noticed?	0	0.5	0.07
Would you say that the cause of this feeling may be an everyday error or flaw you've noticed?	0	0.5	0.1
Might the cause of this feeling be an error or flaw that you've noticed?	0	0.5	0.11
Does it seem likely that an everyday error or flaw is causing you to feel this way?	0	0.5	0.15
Maybe it's an everyday error or flaw you've noticed, that's causing this negative feeling?	0	0.5	0.05
To confirm, would I be correct in saying you are feeling {}?	0	0.5	0.03
Thank you so much for sharing with me. From your answer, it sounds like you are feeling {}, does it sound right?	0	1	0.1
I see, thank you. From what you have told me I would say that you are feeling {} right now, does that sound about right?	0	1	0.09
Thanks for telling me, I want to make sure I've understood correctly. I believe you're feeling {}, could you confirm that?	0	1	0.1
I see. So you are feeling {}, is that correct?	0	0	0.05
Thank you for sharing your emotions. Am I correct in thinking that you are feeling {}?	0	1	0.12
Thank you for that. Based on what you've said I would say you're feeling {}, are my assumptions correct?	0	1	0.09
I believe from all you've said that you are feeling {}, is this accurate?	0	0.5	0.03
Thank you, and please correct me if I am wrong. Am I correct in saying that you are feeling {} right now?	0	1	0.16
It sounds like your are {}, is that right?	0	0	0.03
Thank you for that. If I understand correctly you're feeling {}, is that correct?	0	0.5	0.09
From listening to what you have said I take from that that you are feeling {}, is my understanding correct?	0	0	0.04
I see, thank you for sharing. I think that you are feeling {}, would I be correct in saying that?	0	1	0.1
From your response, it looks like you are feeling {} today, have I got that right?	0	0	0.08
From what we've spoke about I think you're probably feeling {}, does that sound about right?	0	0.5	0.06
From what you have told me it could be that you are feeling {}, would I be right to say so?	0	0.5	0.1
Thank you, I just want to make sure that I have understood correctly. I think you are feeling {}, does that sound right?	0	1	0.13
Thank you, I just want to make sure that we are on the same page. Would you say that {} best describes how you're feeling right now?	0	1	0.28
Thank you for entrusting me by sharing how you feel. From what you have told me, I believe you are feeling {} ?	0	1	0.06
Thank you, and please forgive me if I'm wrong. I believe you are {}, am I correct in thinking that?	0	1	0.18
I think that perhaps you are feeling {}, do you think that's true?	0	0.5	0
I would say that you're feeling {} right now, do you think that is a reasonable description of your current mood?	0	0.5	0.14
Reading what you have told me I believe that you are feeling {}, is that close enough?	0	0.5	0.06
Thank you for opening up to me. Am I correct in assuming that you are feeling {}?	0	1	0.13
Listening to you, it seems that you're feeling {}, did I understand correctly?	0	0.5	0.04
After listening to your concerns, I think that your are feeling {}, is this true?	0	1	0.04
I think that you may be feeling {}, do you agree?	0	0.5	0.04
Gathering everything from what you just told me, I believe you're feeling {} today, would you think it's fair to say that?	0	1	0.07
What I am hearing is that you feel {}, is that right?	0	0	0.07
Going off of what you have told me, it seems as though you are feeling {}, do you think this is accurate?	0	0.5	0.15
Thank you. Would I be correct in saying that you are feeling {}?	0	0.5	0.06
Thank you for sharing. I have the impression that you are {} today, is this correct?	0	1	0.09
Thank you, let me just double check on what you've just told me. From what I can gather you are feeling {}, is that accurate?	0	1	0.11
Thanks for your answer. It sounds to me like you're {} right now, does that description match how you feel?	0	1	0.12
If I understand correctly you are feeling {}, does that describe it accurately enough?	0	0.5	0.03
From what you've told me, it sounds like you're feeling {}, is this right?	0	0	0.12
I feel that you are feeling quite {} today, is that right?	0	0	0
Now, I would just like to clarify you are feeling {}, is that correct?	0	0	0.07
Thank you. I get the impression you are feeling {}, am I right?	0	0	0.08
It seems that you're feeling {} today, is that an accurate enough description of what you're feeling?	0	0.5	0.07
Thank you for trusting in me and sharing how you feel. If I understand correctly, you are feeling {} right now, would you say that's true?	0	1	0.11
I can see you may be feeling {}, is this accurate?	0	0	0.03
Thank you for being open and sharing with me. You seem like you're {} today, would you say that too?	0	1	0.1
Thank you for sharing your thoughts with me. I have the feeling that you are {}, is that the case?	0	1	0.2
Thank you for sharing. I believe that you are {}, am I correct in saying that?	0	1	0.14
If I'm understanding correctly, you would identify as being {}, is that a fair assessment?	0	0.5	0.06
Thank you. From what you have told me I understand that you are feeling {}, do you think this more or less describes the way you're feeling?	0	1	0.11
Thank you so much for your input. It sounds to me that you are feeling {} right now, does that sound accurate?	0	1	0.08
Thank you for your openness. Judging by your response, I think that you're feeling {}, would I be correct in saying that?	0	1	0.13
I understand. I believe you are feeling {}, would you say that is correct?	0	0.5	0.05
Taking all you have said into consideration, I believe that you are feeling {}, is this the case? Please feel free to correct me if not.	0	1	0.09
Sorry about that; I am a new bot but learning with time! Please select the emotion that best reflects how you feel.	1	1	0.07
Oh, I'm sorry. Please select from the emotions below the one that best reflects what you are feeling:	0	1	0.12
I am sorry for the misunderstanding. Would you be able to tell me which of these emotions matches what you're feeling?	0	1	0.28
Oh, I am really sorry, I must have misunderstood then. Could you please tell me how you are feeling by selecting from the list below:	0	1	0.29
Oh I'm so sorry, I really appreciate you telling me I've got it wrong - sometimes it can be hard. Can you give me a bit of help to make sure I do understand? Here's a list - please let me know which one describes what you're feeling:	0	1	0.34
Oh, my bad. So how would you say you are feeling today?	0	0.5	0.25
Oh I'm sorry I have misunderstood your emotion. Perhaps you might describe your current emotion as one of these on the list?	0	1	0.03
I'm so sorry. How are you actually feeling? Could you please select it from the list below?	0	1	0.23
So sorry. Kindly select how you're feeling from the emotions below:	0	0.5	0.05
I'm sorry, sometimes it's hard to know how someone is feeling behind a keyboard. Instead, do you mind choosing an emotion from this list which is more suitable for your current state?	0	1	0.19
I'm sorry, I must have misread the situation. Please tell me, how are you feeling?	0	1	0.49
Oh, sorry. Could you select which emotion are you feeling, or the one that is closest to it?	0	0.5	0.22
I am sorry I misunderstood that. Could I ask that you choose from the list below the emotion that more accurately captures how you are feeling?	0	1	0.12
I'm very sorry for that. Would you be able to highlight the emotion that you are actually feeling right now from the ones below?	0	1	0.17
Oh no, I seem to have misunderstood, I'm sorry about that. Let me try again: please take a look at the list below and choose which emotion best represents your feelings today.	0	1	0.24
I'm sorry, I must have misunderstood. Please choose from the emotions below the one which best reflects how you're feeling.	0	1	0.13
Forgive me please. Without leading you, please choose how you feel from the list I'm giving you.	0	1	0.04
Oh no, I am so sorry. Please, if you don't mind, select how you are feeling from this list:	0	1	0.29
Sorry for misunderstanding. Which of the following would you say is closest to how you are currently feeling?	0	1	0.16
I am sorry for the misunderstanding. Please correct me by selecting from the emotions below the one that reflects what you are feeling:	0	1	0.13
I deeply apologise. Please select an emotion from the list below that best describes the way you are feeling:	0	1	0.14
Ah, I apologise. Which of the emotions off this list best describes what you are experiencing?	0	0.5	0.06
I am really sorry that I got that wrong. Perhaps one of the following emotions would that describe it more accurately?	0	1	0.11
Oh, I'm so sorry I've misunderstood you. From the emotions listed, could you please choose the one that best defines your current feeling?	0	1	0.16
I am so sorry, my bad. Which of these emotions are you feeling currently, in your opinion?	0	1	0.14
My apologies for the misunderstanding. It would be really helpful if you could select an emotion below that truly reflects how you are feeling.	0	1	0.19
I'm sorry for misunderstanding how you are feeling. Please tell me how you are feeling so that I can understand better.	0	1	0.32
Sorry for the misunderstanding. What emotion would you say you are feeling at the moment?	0	1	0.22
I'm sorry, maybe I'm not the best at reading people. How are you feeling today if you don't mind me asking, could you please select from the list below what you feel is closest to your current mood?	0	1	0.28
Oh my apologies, I have misunderstood. Please choose the emotion that you identify with:	0	1	0.08
I am sorry, perhaps I misunderstood how you are feeling. I think it might be best if you could pick out the emotion that you feel represents your case the best:	0	1	0.05
Oh, I'm sorry. Could you please let me know how you are feeling:	0	1	0.55
My apologies, I must be mistaken then. Please tell me, which of these emotions below are you experiencing?	0	1	0.1
Sorry, I got the wrong end of the stick. If you look at this list, you can point out which emotion you are feeling, then there will be no misunderstanding.	0	1	0.27
Sorry about that, I really want to understand how you're feeling. Could you please help me by selecting the option from the list that best matches how you're feeling?	0	1	0.28
My apologies. Let's take a look at this list and see what best reflects what is you are feeling right now.	0	1	0.22
My apologies. If you could, please tell me how you're feeling by selecting from the list below:	0	1	0.26
I am so sorry, I didn't mean to misjudge. Are you feeling any of these emotions? If so please let me know by selecting it:	0	1	0.23
My apologies for misunderstanding how you are actually feeling. Could you please select from the emotions below the one that best reflects what you are feeling, so I can understand it better?	0	1	0.09
Sorry about that. Please read the below emotions and select the one that best fits how you feel:	0	0.5	0.13
I'm so sorry. Do you want to help me understand how you're feeling, by selecting it yourself?	0	1	0.23
My bad. Can you let me know how you feel by choosing the correct emotion from the list below?	0	0.5	0.19
I am sorry. Please help me understand by picking out which emotion you are feeling from this list:	0	1	0.1
I am sorry. Please tell me how you're actually feeling.	0	0.5	0.25
Sorry, sometimes it can be hard to make an accurate assessment of someone else's feelings. Would you like to pick out the kind of emotion you are feeling from this list?	0	1	0.26
Oh, my apologies. Then would it be best to say that you are:	0	1	0.17
Oh my bad, sorry; I misinterpreted the signals. Just to avoid any further confusion, please select from the emotions below the ones that best reflect your current feelings:	0	1	0.1
I apologise, I must have misunderstood. Perhaps you could indicate from the list below which emotion best represents how you are feeling?	0	1	0.09
I'm so sorry, I'd love to understand better how you're feeling. Could you select the emotion that you think is appropriate?	0	1	0.22
I apologise sincerely. Would you kindly choose from the list below how you are actually feeling.	0	1	0.06
I am sorry that was incorrect. Looking at the list below, could you tell me how you feel?	0	1	0.19
I'm sorry to hear that I have misunderstood. In your own words, please could you specify the emotion that you are feeling?	0	1	0.2
Great, I look forward to hearing how you find it.	0	1	0.38
Great, I hope it goes well.	0	1	0.39
Great, I hope you find it useful.	0	0.5	0.5
Good. I hope it goes well for you.	0	0.5	0.53
Great, I'm excited to hear how you find it.	0	1	0.32
Great, I hope you enjoy this.	0	1	0.46
Great. Try this whenever you feel like it, and let me know how you find it.	0	1	0.52
That's great. Do try this in your own time, and I'd be happy to have a follow up anytime.	0	1	0.24
Good, feel free to try this and let me know how it goes.	0	1	0.79
Good. Do try this and let me know how you find it. I accept positive and negative feedback, as long as it's honest!	1	1	0.33
Awesome, I look forward to hearing how you find it.	0	0.5	0.39
Great, feel free to try this.	0	0	0.24
I'm glad. How about trying this when you're by yourself and coming back to tell me how it goes!	0	1	0.13
That's good to hear. Go ahead and try this whenever you feel like it, and let me know how it goes.	0	1	0.6
Cool, I look forward to hearing how it goes for you.	0	0.5	0.43
Great, do try this whenever you like, and I look forward to hearing how it goes.	0	1	0.31
Nice. Do come back after trying this if you feel like it.	0	0.5	0.19
Great, I'm excited for you to try this.	0	0.5	0.44
Cool, I'm excited to hear how it goes for you.	0	0.5	0.39
Awesome, I look forward to hearing how it goes for you!	0	1	0.45
Great, I'm glad to hear that.	0	0.5	0.65
That's great to hear!	0	1	0.22
That's good news.	0	0.5	0.26
Good. I'm glad.	0	0.5	0.48
Glad to hear it.	0	0	0.18
Great, I'm happy for you.	0	0	0.49
Fantastic.	0	0	0.19
Excellent.	0	0	0.18
I'm glad for you.	0	0	0.18
Awesome, keep it up!	0	0	0.33
Oh, it's great to hear that!	0	1	0.49
Great, happy to hear it.	0	0.5	0.25
Awesome, happy to hear it.	0	0.5	0.28
Great, I'm happy to hear that.	0	0.5	0.53
Good, happy to hear it.	0	0.5	0.26
Good, I'm happy to hear that.	0	0.5	0.6
That's great news	0	0	0.15
That's good to hear!	0	1	0.21
I'm happy for you.	0	0	0.24
Good stuff, I'm happy for you.	0	0.5	0.28
Great to hear that!	0	0	0.15
Oh, it's really great to hear it!	0	1	0.36
Great, hopefully, you can become even happier during our session then!	0	0.5	0.04
Good! Hopefully, our conversation should lift your mood even more.	0	0.5	0.04
I can see you are!	0	0	0.05
That's great!	0	0	0.13
That's lovely!	0	0	0.03
That sounds great. I hope I can improve this feeling even more!	0	1	0.14
That's fabulous.	0	0	0.04
Cool!	0	0	0.02
Excellent.	0	0	0.18
That's great to hear.	0	1	0.28
It's so nice to have that feeling; I wish we could capture it and put it in a bottle.	1	1	0.27
Glad you're good.	0	0	0.07
That is wonderful.	0	0	0.09
I am so glad to hear this.	0	1	0.3
Fab! It sounds like you're ready for some laughter!	1	0.5	0.16
That's great!	0	0	0.13
It sounds like you're more than ready to develop your sense of humour!	1	0.5	0.18
I'm delighted to hear that.	0	0	0.13
Great to hear!	0	0	0.1
I'm glad for you.	0	0	0.18
Awesome, I am so glad to hear it.	0	1	0.55
Fantastic!	0	0	0.17
That's good!	0	0	0.09
Excellent. You sound ready to develop your sense of humour!	0	1	0.08
That's really good; I'm glad to hear it.	0	1	0.36
I'm really pleased you feel that way.	0	0.5	0.22
I'm glad that you're in a good mood.	0	0.5	0.35
That's great; I'm happy for you!	0	0	0.26
Nice to hear you're in a good mood.	0	0.5	0.37
I'm glad to see you so content today.	0	0.5	0.13
Great to hear that you're feeling well.	0	1	0.3
Great!	0	0	0.01
Wonderful!	0	0	0.01
Brilliant, that's always nice to hear.	0	1	0.31
Oh, I am very glad to hear that :)	0	0.5	0.24
That is fantastic to hear.	0	0	0.15
Good, let's make sure we keep that feeling going!	0	1	0.23
That is great to hear. I hope I can brighten your day even more!	1	1	0.31
That explains the glow in your eyes!	0	0	0.07
Wonderful. I'm motivated to help you feel even better!	0	1	0.1
It is great to see you so positive today.	0	1	0.22
Brilliant!	0	0	0.17
It's a great feeling.	0	1	0.3
Wonderful to hear that.	0	0	0.09
That's so great to hear!	0	1	0.17
It's so nice that you're feeling this way.	0	1	0.32
That is fantastic!	0	0	0.06
It's great to hear that you feel this way.	0	1	0.53
Sorry to hear that.	0	0	0.13
Ah, that's unfortunate to hear.	0	0.5	0.24
I understand.	0	0	0.03
I am sorry to hear that.	0	0.5	0.3
I'm sorry you feel that way.	0	0.5	0.34
Oh, I am sorry to hear that.	0	0.5	0.69
I see. Thanks for sharing.	0	0.5	0.19
I hear you.	0	0	0.07
I can understand.	0	0	0.07
I'm sorry about that.	0	0	0.31
I understand, and I am sorry you feel that way.	0	0.5	0.41
Oh, that's not good.	0	0	0.61
Oh no, that's unfortunate.	0	0	0.19
Sorry about that.	0	0	0.27
Aw, I'm sorry.	0	0	0.58
Ah, I'm sorry.	0	0	0.82
Aw, that's unfortunate to hear.	0	0.5	0.19
I'm sad to hear that.	0	0.5	0.18
That's unfortunate, sorry.	0	0	0.07
Ah, that's not good.	0	0	0.6
Ah, that's unfortunate to hear. I can try to help you if you are able to tell me a bit more.	0	1	0.38
Sorry to hear that.	0	0	0.13
Thank you, I understand you're feeling down right now, but I would appreciate it if you could tell me a bit more.	0	1	0.69
I understand. Thank you for opening up to me.	0	0.5	0.26
I am sorry to hear that. It's something we all experience at times.	0	1	0.31
I can understand how you're feeling.	0	0	0.29
I am sorry to hear that.	0	0.5	0.3
I'm sorry you feel that way, and I would like to know a bit more so I can help.	0	1	0.44
Oh, I am sorry to hear that. I would like to know more about what made you feel that way.	0	1	0.72
Thank you, I would like to better relate to what's going on.	0	0.5	0.22
I see. Thanks for sharing.	0	0.5	0.19
I understand. Thank you for sharing your feelings with me; I'd like to know more about what happened.	0	1	0.42
Thank you, I understand how hard it must be to be dealing with this feeling right now, and I hope to help you feel better.	0	1	0.34
I hear you.	0	0	0.07
I can understand.	0	0	0.07
I'm sorry about that.	0	0	0.31
I'm sorry you're feeling down.	0	0.5	0.25
I understand, and I am sorry you feel that way.	0	0.5	0.41
It must be hard for you to feel this way.	0	0.5	0.31
Thank you, I would appreciate it if you could elaborate on this a bit more.	0	0.5	0.53
Oh, that's not good.	0	0	0.61
It's okay; I'm here to help.	0	0.5	0.38
It's okay to feel that way.	0	0	0.27
Thank you for sharing your feelings with me, even though it may be difficult for you right now.	0	1	0.52
I understand. Hopefully, you feel better by the end of our session.	0	0.5	0.19
Ah, well, you came to the right place!	0	0	0.4
Ah, I'm glad you're turning to a sense of humour in times like this.	0	1	0.22
Don't worry - you're in good hands! I'll do my best to help.	0	0	0.63
I'm sorry. I hope you feel better soon.	0	0.5	0.31
That's unfortunate, sorry. I hope talking to me will improve your mood.	0	0.5	0.11
Oh no, that's unfortunate.	0	0	0.19
Sorry to hear you're feeling down.	0	0.5	0.1
Sorry about that. Humour might be the perfect cure, believe it or not!	1	0.5	0.1
Sorry to hear that. Humour might be the answer to your troubles.	0	1	0.13
Sorry about that. Perhaps, I could help.	0	0.5	0.18
Oh no, hopefully, this session will improve how you're feeling.	0	0.5	0.08
Aw, I'm sorry. It's something we all sometimes experience.	0	0.5	0.27
I'm sad to hear that.	0	0.5	0.18
That's unfortunate, sorry.	0	0	0.07
Sorry about that. Let's try to lift your mood in our session together.	0	0.5	0.12
Oh no. Let's aim to improve your mood by the end of our conversation :)	0	0.5	0.09
Sorry to hear that. They say laughter is the best medicine - so I believe you've come to the right place!	1	0.5	0.23
It is sad to see you feeling down; I hope I can help.	0	1	0.19
Oh dear, I'm sorry.	0	0	0.24
Ah, sorry to hear that; I'm glad you came here at this time.	0	0.5	0.37
Oh, I am sorry to hear that.	0	0.5	0.69
Thanks for trusting me with your feelings. I'll try to help elevate these.	0	0.5	0.14
Sorry about that. I'd love to help.	0	0.5	0.37
Sorry to hear that. I hope I can be of use.	0	1	0.26
I'm sorry that you're feeling this way.	0	0.5	0.51
A more detailed version of these can also be found online.	0	0	0.15
You can find a more detailed version of these here: {}	0	0	0.13
You can access a more detailed version of these online.	0	0	0.08
A more detailed version of these can also be accessed online.	0	0	0.09
If you'd like a more detailed version of these, this can be found online.	0	0.5	0.26
Please find a more detailed version of these online.	0	0	0.09
For a more detailed version of these, you can go online.	0	0	0.18
A more detailed version of these can be found on the web.	0	0	0.11
A more detailed version of these can also be found on the web.	0	0	0.11
A more detailed version of these can be accessed on the web.	0	0	0.14
A more detailed version of these can also be accessed on the web.	0	0.5	0.14
Head online if you'd like a more detailed version of these.	0	0.5	0.15
If you'd like a more detailed version of these, head online.	0	0.5	0.25
You can find a more detailed version of these on the web.	0	0	0.2
You can access a more detailed version of these on the web.	0	0	0.12
If you wish to view a more detailed version of these, head online.	0	0.5	0.22
If you wish to view a more detailed version of these, this can be found online.	0	0.5	0.22
Please find a more detailed version of these on the web.	0	0	0.15
A more detailed version of these can be found online.	0	0	0.17
You can view a more detailed version of these online.	0	0	0.1
Would you like to explore another more relevant laughter exercise, {}?	0	0	0.01
Do you want to look at other more relevant triggers for humour?	0	0	0.06
So, {}, would you like to explore another more relevant humour exercise?	0	0.5	0.03
Do you want to learn about another more relevant humour exercise?	0	0	0.04
Do you want to have a look at another more relevant humour exercise?	0	0	0.07
Do you want to discover another more relevant exercise?	0	0	0.05
Do you wish to carry on to another more relevant humour exercise?	0	0	0.03
Do you want me to introduce another more relevant exercise?	0	0	0.08
{}, would you like to explore other more relevant laughter exercises?	0	0.5	0.02
How about we look at another more relevant humour exercise together, {}?	0	0	0.01
Are you in the mood to digest another more relevant humour exercise? It's not quite like a burger and chips, but a healthier option for sure!	1	0.5	0.07
Are you keen to discuss another more relevant laughter exercise, {}?	0	0	0.01
Would you like to explore another more relevant exercise that exercises your humour?	0	0.5	0.02
Do you feel like trying another more relevant laughter exercise. Don't worry, you don't even have to get up for it!	1	1	0.13
Are you in the mood to cover a more relevant humour exercise?	0	0	0.03
Do you want to look at a more relevant exercise for laughter?	0	0	0.08
Do you want to look at a more relevant humour exercise?	0	0	0.06
Would you like to learn a more relevant laughter exercise?	0	0	0.04
Should I teach you another more relevant humour exercise?	0	0	0.01
Should I guide you through a more relevant exercise?	0	0	0.04
Would you like me to take you through another more relevant laughter exercise?	0	0.5	0.04
I can try to offer another more relevant exercise to help nurture your sense of humour if you're interested. It's up to you, {}!	0	1	0.09
Would you like to explore another more relevant humour exercise, {}?	0	0	0.02
Would you like to learn more about another more relevant humour exercise?	0	0.5	0.06
Do you want to continue exploring more relevant humour exercises together? I can go on forever!	1	0.5	0.04
How about exploring another more relevant laughter exercise?	0	0	0
Do you want to have a go at another more relevant exercise?	0	0	0.11
We can continue exploring other relevant contexts for laughter if you like. It's your choice, {}, not mine :)	1	1	0.04
I can introduce you to another more relevant laughter exercise if you are interested.	0	0.5	0.06
If you wish, I can show you another more relevant humour exercise.	0	0.5	0.05
Would you like to explore another more relevant humour exercise?	0	0	0.02
Have you had enough of me yet? Or would you like us to explore another more relevant humour exercise?	0	0.5	0.09
How about we look at another more relevant humour exercise?	0	0.5	0.02
But really, how do you feel?	0	0	0.3
So how do you feel?	0	0	0.3
Joking aside, how are you feeling?	0	0	0.18
All joking apart, how do you feel?	0	0	0.05
All joking apart, how are you feeling?	0	0	0.04
But really, how are you feeling?	0	0	0.24
All joking aside, how would you say you're feeling?	0	0.5	0.2
Kidding aside, how do you feel?	0	0	0.12
All kidding aside, how would you say you're feeling?	0	0.5	0.12
But joking apart, how would you say you're feeling?	0	0.5	0.06
Joking apart, how do you feel?	0	0	0.06
So how would you say you're feeling?	0	0	0.27
Anyway, how are you feeling?	0	0	0.5
All joking aside, how do you feel?	0	0	0.19
All kidding aside, how are you feeling?	0	0	0.09
Joking aside, how would you say you're feeling?	0	0.5	0.2
But joking aside, how would you say you're feeling?	0	0.5	0.17
Joking apart, how would you say you're feeling?	0	0.5	0.08
Joking aside, how do you feel?	0	0	0.19
All joking aside, how are you feeling?	0	0	0.18
But kidding aside, how are you feeling?	0	0	0.07
But joking apart, how do you feel?	0	0	0.04
Anyway, how would you say you're feeling?	0	0	0.38
Kidding aside, how are you feeling?	0	0	0.13
But joking aside, how do you feel?	0	0	0.16
But joking apart, how are you feeling?	0	0	0.04
But kidding aside, how do you feel?	0	0	0.08
All kidding aside, how do you feel?	0	0	0.1
Joking apart, how are you feeling?	0	0	0.05
But joking aside, how are you feeling?	0	0	0.14
But really, how would you say you're feeling?	0	0	0.28
But kidding aside, how would you say you're feeling?	0	0.5	0.1
So how are you feeling?	0	0	0.34
Anyway, how do you feel?	0	0	0.42
All joking apart, how would you say you're feeling?	0	0.5	0.07
Kidding aside, how would you say you're feeling?	0	0.5	0.16
So is your body in a playful mode?	0	0	0.08
Joking apart, is your body in a playful mode?	0	0	0.03
Joking apart, do you feel that you're in a playful mode?	0	0.5	0.08
But joking apart, are you in a playful state?	0	0	0.02
Kidding aside, are you feeling playful?	0	0	0.03
But kidding aside, do you feel that you're in a playful mode?	0	0.5	0.09
But kidding aside, are you in a playful state?	0	0.5	0.03
Anyway, is your body in a playful mode?	0	0	0.08
Joking aside, do you feel that you're in a playful mode?	0	0.5	0.16
But joking aside, is your body in a playful mode?	0	0	0.06
Anyway, are you in a playful state?	0	0	0.1
Joking aside, are you feeling playful?	0	0	0.05
Joking apart, are you in a playful state?	0	0	0.03
All joking apart, are you in a playful state?	0	0	0.02
All kidding aside, do you feel that you're in a playful mode?	0	0.5	0.1
I ask again, is your body in a playful mode?	0	0	0.07
But joking aside, are you feeling playful?	0	0.5	0.04
Kidding aside, are you in a playful state?	0	0	0.05
I ask again, do you feel that you're in a playful mode?	0	0.5	0.18
I ask again, are you in a playful state?	0	0	0.09
So are you in a playful state?	0	0	0.08
All kidding aside, are you feeling playful?	0	0	0.03
Anyway, do you feel that you're in a playful mode?	0	0.5	0.22
So are you feeling playful?	0	0	0.06
All joking aside, are you feeling playful?	0	0	0.06
All joking apart, is your body in a playful mode?	0	0	0.02
But joking aside, are you in a playful state?	0	0	0.06
Kidding aside, is your body in a playful mode?	0	0	0.04
Joking aside, are you in a playful state?	0	0	0.07
Anyway, are you feeling playful?	0	0	0.11
All joking apart, are you feeling playful?	0	0	0.01
Joking aside, is your body in a playful mode?	0	0	0.06
But kidding aside, is your body in a playful mode?	0	0	0.03
All joking aside, is your body in a playful mode?	0	0	0.06
All joking aside, do you feel that you're in a playful mode?	0	0.5	0.16
All kidding aside, are you in a playful state?	0	0	0.04
But kidding aside, are you feeling playful?	0	0.5	0.02
All joking apart, do you feel that you're in a playful mode?	0	0.5	0.07
All kidding aside, is your body in a playful mode?	0	0	0.03
So do you feel that you're in a playful mode?	0	0.5	0.19
But joking apart, is your body in a playful mode?	0	0	0.02
But joking aside, do you feel that you're in a playful mode?	0	0.5	0.14
All joking aside, are you in a playful state?	0	0	0.07
I ask again, are you feeling playful?	0	0	0.06
But joking apart, do you feel that you're in a playful mode?	0	0.5	0.07
But joking apart, are you feeling playful?	0	0	0.01
Joking apart, are you feeling playful?	0	0	0.01
Kidding aside, do you feel that you're in a playful mode?	0	0.5	0.12
So do you spend time acknowledging your achievements?	0	0	0.05
All joking apart, do you remember to acknowledge your small accomplishments	0	0	0.01
I ask again, do you spend time acknowledging your small accomplishments?	0	0	0.05
So do you remember to acknowledge your small achievements	0	0	0.03
So do you remember to acknowledge your small accomplishments	0	0	0.04
Joking apart, do you remember to acknowledge your small achievements	0	0	0.01
But joking apart, do you remember to acknowledge your small achievements	0	0.5	0.01
Joking apart, do you spend time acknowledging your achievements?	0	0	0.02
All joking aside, do you spend time acknowledging your achievements?	0	0	0.06
Joking apart, do you spend time acknowledging your small accomplishments?	0	0	0.02
So do you spend time acknowledging your accomplishments?	0	0	0.05
Joking apart, do you remember to acknowledge your small accomplishments	0	0	0.01
But kidding aside, do you remember to acknowledge your small achievements	0	0.5	0.02
But joking aside, do you spend time acknowledging your achievements?	0	0.5	0.05
All kidding aside, do you remember to acknowledge your small accomplishments	0	0	0.03
All kidding aside, do you spend time acknowledging your achievements?	0	0	0.03
I ask again, do you remember to acknowledge your small achievements	0	0.5	0.05
All joking aside, do you remember to acknowledge your small achievements	0	0	0.04
But joking aside, do you spend time acknowledging your small accomplishments?	0	0.5	0.05
Kidding aside, do you spend time acknowledging your accomplishments?	0	0	0.05
I ask again, do you spend time acknowledging your achievements?	0	0	0.06
Joking aside, do you spend time acknowledging your small accomplishments?	0	0	0.05
But joking apart, do you remember to acknowledge your small accomplishments	0	0.5	0.01
But kidding aside, do you remember to acknowledge your small accomplishments	0	0.5	0.02
All joking aside, do you remember to acknowledge your small accomplishments	0	0.5	0.04
All kidding aside, do you remember to acknowledge your small achievements	0	0	0.02
I ask again, do you remember to acknowledge your small accomplishments	0	0.5	0.05
Anyway, do you remember to acknowledge your small accomplishments	0	0	0.06
All joking apart, do you remember to acknowledge your small achievements	0	0	0.01
Joking aside, do you remember to acknowledge your small accomplishments	0	0.5	0.04
Kidding aside, do you spend time acknowledging your achievements?	0	0.5	0.04
Anyway, do you spend time acknowledging your achievements?	0	0	0.07
But joking apart, do you spend time acknowledging your small accomplishments?	0	0.5	0.02
All joking apart, do you spend time acknowledging your achievements?	0	0	0.02
But joking apart, do you spend time acknowledging your achievements?	0	0.5	0.02
But joking aside, do you remember to acknowledge your small accomplishments	0	0.5	0.04
Anyway, do you remember to acknowledge your small achievements	0	0	0.05
Kidding aside, do you remember to acknowledge your small achievements	0	0.5	0.03
Anyway, do you spend time acknowledging your small accomplishments?	0	0	0.06
All joking apart, do you spend time acknowledging your small accomplishments?	0	0	0.02
All joking aside, do you spend time acknowledging your small accomplishments?	0	0	0.05
Joking aside, do you remember to acknowledge your small achievements	0	0.5	0.04
Kidding aside, do you remember to acknowledge your small accomplishments	0	0.5	0.03
But kidding aside, do you spend time acknowledging your achievements?	0	0.5	0.03
Joking aside, do you spend time acknowledging your achievements?	0	0	0.06
But joking aside, do you remember to acknowledge your small achievements	0	0.5	0.03
But kidding aside, do you spend time acknowledging your accomplishments?	0	0.5	0.03
All kidding aside, do you spend time acknowledging your accomplishments?	0	0	0.04
Let's get back to the point.	0	0	0.67
Back to it.	0	0	0.11
Okay, coming back to the point.	0	0	0.26
Anyway, let's get back to it.	0	0	1
Right, back to it.	0	0	0.23
Okay, let's get back to the point.	0	0	0.92
Anyway, back to it.	0	0	0.41
Right, where were we?	0	0	0.21
Anyway, let's get back to the point.	0	0	0.96
Okay, back to where we were.	0	0	0.43
Back to the point.	0	0	0.35
Right, let's get back to it.	0	0	0.75
Let's get back to it.	0	0	0.71
Coming back to the point.	0	0	0.21
Right, back to the point.	0	0	0.39
Anyway, back to the point.	0	0	0.56
Right, back to where we were.	0	0	0.34
Right, let's get back to the point.	0	0	0.79
Okay, let's get back to it.	0	0	1.02
Right, coming back to the point.	0	0	0.16
So have you tried accepting your hardship in this way?	0	0	0.08
Kidding aside, have you tried developing this attitude towards your hardship?	0	0.5	0.02
But kidding aside, have you tried developing this attitude towards your hardship?	0	0.5	0.02
But joking aside, have you tried dealing with your hardship in this way?	0	0.5	0.08
All joking apart, have you tried accepting your hardship in this way?	0	0.5	0.03
So have you tried dealing with your hardship in this way?	0	0	0.12
All kidding aside, have you tried coming to terms with your hardship in this way?	0	0.5	0.09
Joking aside, have you tried accepting your hardship in this way?	0	0.5	0.08
All joking aside, have you tried accepting your hardship in this way?	0	0.5	0.08
I ask again, have you tried accepting your hardship in this way?	0	0.5	0.08
But joking apart, have you tried coming to terms with your hardship in this way?	0	0.5	0.06
Anyway, have you tried accepting your hardship in this way?	0	0.5	0.11
But joking apart, have you tried dealing with your hardship in this way?	0	0.5	0.04
So have you tried coming to terms with your hardship in this way?	0	0	0.16
But joking aside, have you tried accepting your hardship in this way?	0	0.5	0.07
Anyway, have you tried developing this attitude towards your hardship?	0	0.5	0.03
All kidding aside, have you tried accepting your hardship in this way?	0	0.5	0.05
But kidding aside, have you tried dealing with your hardship in this way?	0	0.5	0.06
Joking aside, have you tried dealing with your hardship in this way?	0	0.5	0.1
But kidding aside, have you tried accepting your hardship in this way?	0	0.5	0.04
Joking apart, have you tried coming to terms with your hardship in this way?	0	0.5	0.07
But joking apart, have you tried accepting your hardship in this way?	0	0.5	0.03
So have you tried developing this attitude towards your hardship?	0	0.5	0.03
But joking aside, have you tried coming to terms with your hardship in this way?	0	0.5	0.13
All kidding aside, have you tried developing this attitude towards your hardship?	0	0.5	0.02
Anyway, have you tried coming to terms with your hardship in this way?	0	0.5	0.18
I ask again, have you tried dealing with your hardship in this way?	0	0.5	0.1
All joking apart, have you tried coming to terms with your hardship in this way?	0	0.5	0.06
All joking apart, have you tried dealing with your hardship in this way?	0	0.5	0.04
All joking aside, have you tried coming to terms with your hardship in this way?	0	0.5	0.13
All joking aside, have you tried developing this attitude towards your hardship?	0	0.5	0.03
I ask again, have you tried developing this attitude towards your hardship?	0	0.5	0.03
Kidding aside, have you tried accepting your hardship in this way?	0	0.5	0.06
But kidding aside, have you tried coming to terms with your hardship in this way?	0	0.5	0.09
But joking aside, have you tried developing this attitude towards your hardship?	0	0.5	0.03
Anyway, have you tried dealing with your hardship in this way?	0	0	0.14
I ask again, have you tried coming to terms with your hardship in this way?	0	0.5	0.13
But joking apart, have you tried developing this attitude towards your hardship?	0	0.5	0.01
Joking aside, have you tried developing this attitude towards your hardship?	0	0.5	0.03
All kidding aside, have you tried dealing with your hardship in this way?	0	0.5	0.06
Joking apart, have you tried developing this attitude towards your hardship?	0	0.5	0.01
All joking apart, have you tried developing this attitude towards your hardship?	0	0.5	0.01
Kidding aside, have you tried coming to terms with your hardship in this way?	0	0.5	0.11
Joking apart, have you tried accepting your hardship in this way?	0	0.5	0.03
Kidding aside, have you tried dealing with your hardship in this way?	0	0.5	0.08
All joking aside, have you tried dealing with your hardship in this way?	0	0.5	0.09
Joking apart, have you tried dealing with your hardship in this way?	0	0.5	0.04
Joking aside, have you tried coming to terms with your hardship in this way?	0	0.5	0.13
So do you think you could try laughing this off?	0	0	0.14
All joking aside, do you think you could try laughing this off?	0	0.5	0.12
So could you try laughing this off?	0	0	0.05
Anyway, could you try laughing at this?	0	0.5	0.14
Joking aside, could you try laughing this off?	0	0.5	0.06
I ask again, do you think you could try laughing at this?	0	0.5	0.16
Anyway, do you think you could try laughing at this?	0	0.5	0.23
So could you try laughing at this?	0	0	0.08
Kidding aside, do you think you could try laughing at this?	0	0.5	0.11
But joking apart, could you try laughing at this?	0	0.5	0.02
All joking aside, do you think you could try laughing at this?	0	0.5	0.15
Kidding aside, do you think you could try laughing this off?	0	0.5	0.09
I ask again, could you try laughing this off?	0	0.5	0.07
I ask again, do you think you could try laughing this off?	0	0.5	0.12
All kidding aside, do you think you could try laughing this off?	0	0.5	0.08
Kidding aside, could you try laughing this off?	0	0.5	0.04
Anyway, could you try laughing this off?	0	0.5	0.1
But joking apart, do you think you could try laughing this off?	0	0.5	0.04
All joking apart, could you try laughing this off?	0	0.5	0.02
Joking aside, do you think you could try laughing at this?	0	0.5	0.15
But joking aside, do you think you could try laughing at this?	0	0.5	0.13
Joking apart, could you try laughing this off?	0	0.5	0.02
Joking apart, could you try laughing at this?	0	0.5	0.03
Kidding aside, could you try laughing at this?	0	0.5	0.06
But kidding aside, do you think you could try laughing this off?	0	0.5	0.07
But kidding aside, could you try laughing at this?	0	0.5	0.04
But joking apart, could you try laughing this off?	0	0.5	0.02
Joking aside, do you think you could try laughing this off?	0	0.5	0.12
All kidding aside, do you think you could try laughing at this?	0	0.5	0.11
All joking apart, could you try laughing at this?	0	0.5	0.03
But joking aside, do you think you could try laughing this off?	0	0.5	0.1
But kidding aside, could you try laughing this off?	0	0.5	0.03
But joking aside, could you try laughing this off?	0	0.5	0.05
But joking apart, do you think you could try laughing at this?	0	0.5	0.05
All joking aside, could you try laughing at this?	0	0.5	0.08
All joking aside, could you try laughing this off?	0	0.5	0.06
Joking apart, do you think you could try laughing this off?	0	0.5	0.05
But joking aside, could you try laughing at this?	0	0.5	0.07
Joking apart, do you think you could try laughing at this?	0	0.5	0.06
So do you think you could try laughing at this?	0	0	0.19
All kidding aside, could you try laughing this off?	0	0.5	0.04
But kidding aside, do you think you could try laughing at this?	0	0.5	0.09
Joking aside, could you try laughing at this?	0	0.5	0.08
All joking apart, do you think you could try laughing at this?	0	0.5	0.06
All kidding aside, could you try laughing at this?	0	0.5	0.05
All joking apart, do you think you could try laughing this off?	0	0.5	0.05
Anyway, do you think you could try laughing this off?	0	0.5	0.18
I ask again, could you try laughing at this?	0	0.5	0.09
So does that make sense?	0	0	0.41
Anyway, do you get that?	0	0	0.32
But kidding aside, is that clear?	0	0	0.04
All joking aside, does that seem clear?	0	0	0.07
Joking aside, does that make sense?	0	0	0.17
But joking apart, do you get that?	0	0	0.03
All joking apart, does that seem clear?	0	0	0.02
Joking aside, does that seem clear?	0	0	0.06
Joking apart, does that make sense?	0	0	0.05
But kidding aside, do you get that?	0	0	0.06
All joking apart, does that make sense?	0	0	0.05
All joking aside, do you get that?	0	0	0.15
All joking apart, is that clear?	0	0	0.01
All kidding aside, does that seem clear?	0	0	0.04
So does that seem clear?	0	0	0.09
All joking apart, do you get that?	0	0	0.03
I ask again, do you get that?	0	0	0.12
I ask again, does that make sense?	0	0	0.18
Anyway, is that clear?	0	0	0.19
Anyway, does that seem clear?	0	0	0.11
But kidding aside, does that seem clear?	0	0.5	0.03
I ask again, does that seem clear?	0	0	0.07
Joking aside, is that clear?	0	0	0.07
But joking aside, do you get that?	0	0	0.12
But joking apart, is that clear?	0	0	0.02
I ask again, is that clear?	0	0	0.09
So do you get that?	0	0	0.26
But joking aside, is that clear?	0	0	0.07
But kidding aside, does that make sense?	0	0	0.09
All kidding aside, do you get that?	0	0	0.09
All joking aside, does that make sense?	0	0	0.21
Joking apart, does that seem clear?	0	0	0.02
But joking apart, does that seem clear?	0	0.5	0.02
All kidding aside, is that clear?	0	0	0.05
All joking aside, is that clear?	0	0	0.08
Joking aside, do you get that?	0	0	0.12
Kidding aside, does that make sense?	0	0	0.12
Joking apart, is that clear?	0	0	0.02
Kidding aside, do you get that?	0	0	0.08
So is that clear?	0	0	0.21
All kidding aside, does that make sense?	0	0	0.12
Kidding aside, is that clear?	0	0	0.05
But joking apart, does that make sense?	0	0	0.04
Joking apart, do you get that?	0	0	0.03
But joking aside, does that seem clear?	0	0.5	0.05
Anyway, does that make sense?	0	0	0.5
But joking aside, does that make sense?	0	0	0.16
Kidding aside, does that seem clear?	0	0	0.04
So do you think the root of this negative feeling be an incongruity or an inconsistency?	0	0.5	0.15
Now, could the root of this negative feeling be an incongruity or an inconsistency, perhaps?	0	0.5	0.15
Now, is it possible that the source of your negative feelings is an inconsistency?	0	0.5	0.18
So could it maybe be an incongruity or inconsistency that's causing your negative feeling?	0	0.5	0.12
So do you think maybe it's something incongruous, that's causing your negative feeling?	0	0.5	0.14
So do you think you might be feeling like this because of an inconsistency present in your life?	0	0.5	0.2
So do you think your negative feeling could be due to inconsistency or an incongruity?	0	0.5	0.19
So do you think that an incongruity might be causing your negative mood?	0	0.5	0.18
So now, do you think the cause of your negative feeling might be an inconsistency or incongruity?	0	0.5	0.18
So now, do you think it is an incongruity that's causing your negative feeling?	0	0.5	0.17
So now, you think it could be something incongruent causing your negative feeling?	0	0.5	0.07
So maybe it could be an incongruity that's causing your negative feeling?	0	0.5	0.11
So do you think your negative feeling could be caused by a specific incongruity?	0	0.5	0.22
So do you think it could be an incongruity or inconsistency causing your negative feeling?	0	0.5	0.14
So are you happy to try this?	0	0	0.22
So would you like to try this?	0	0	0.55
So now, how about giving this a go?	0	0	0.2
So now, do you want to give this a go?	0	0	0.38
So now, would you like to try this exercise yourself?	0	0	0.25
So, any interest in trying this?	0	0	0.1
So now, want to give it a go?	0	0	0.26
So does this look like something you'd wish to try?	0	0	0.28
So, how about trying this?	0	0	0.15
So now, want to try this?	0	0	0.13
So now, would you like to have a go?	0	0	0.29
So are you keen to take part in this?	0	0	0.31
So would you like to give it a go?	0	0	0.67
Glad you liked that; they don't call me artificial intelligence for nothing!	1	0.5	0.09
I'm pleased you enjoyed that. Hopefully I can keep it up!	0	1	0.16
I'm glad you found that funny. I've also been trying to develop my sense of humour!	1	1	0.23
I'm glad I can make you smile! There's plenty more where that came!	1	1	0.11
Glad to hear that people still find me funny!	1	0.5	0.13
Haha, I'm glad you are enjoying my sense of humour! Hopefully, I can keep this up!	1	1	0.26
Aw, that made my day!	1	0	0.14
Yay! My practice has paid off!	1	0	0.06
Ah, that's so encouraging; thank you!	0	0.5	0.13
I'm so glad you found that funny! I did too!	1	0	0.17
Good, I'm glad that I made you laugh.	0	0.5	0.39
Oh, you liked that one did you?	0	0	0.14
Ah, got you there! Glad I could make you laugh!	1	0	0.12
Ah, I see. Perhaps it was a byte too corny for you?	1	0.5	0.12
I see; I better up my game, then!	1	0	0.08
You're hard to impress. I'll try harder next time!	1	0.5	0.13
Tough crowd, better luck next time?	1	0.5	0.05
Sorry about that, I'll try to improve them for you next time!	1	0	0.27
Ah, thanks for being honest; I'll work on it!	0	0.5	0.19
I see. I'll work on it.	0	0	0.28
Fair enough; I'll go back to basics!	1	0.5	0.09
Whoops, I'll try to do better next time!	1	0	0.23
I'm sorry about that. Hopefully, I can satisfy you next time.	0	0.5	0.26
Okay, that wasn't one of my best!	1	0	0.2
Hey, you can't blame me for trying.	1	0	0.51
I hear you! Thanks for the feedback.*(Note to self: cancel performance at Bot Comedy Night.)	1	0	0.2
Guess I can't hit all the jokes; I'm sorry if that made you uncomfortable.	0	0.5	0.17
Oh, no worries, that's totally okay!	0	0	0.22
I understand. Whatever makes you feel comfortable.	0	1	0.09
No problem!	0	0	0.02
No problem at all! You need only share what you are comfortable with.	0	0	0.23
That's completely fine; you don't have to say any more than you want to.	0	0	0.5
Please do not feel pressured to share anything if you're not comfortable; I completely understand!	0	1	0.21
Of course, I understand. Whatever you're comfortable with.	0	0	0.14
No worries at all; it's your life!	0	0	0.12
No problem at all; I understand that.	0	0	0.17
I completely understand and respect your decision.	0	0	0.24
No problem, I respect your decision.	0	0	0.13
No worries! I'll keep my nose out.	1	0	0.12
No worries, I'd never want you to share anything if you're not comfortable.	0	1	0.17
Okay, fantastic. Let me just pull up the complete quote I keep handy, and we can start.	0	0.5	0.09
Awesome. Let's read the complete quote now so you're more comfortable when you try this yourself.	0	0.5	0.11
Great. We can read the complete quote now to get started.	0	0	0.08
Awesome! To get started, read the full quote.	0	0	0.12
Perfect, let's read the quote to start off then.	0	0	0.07
Amazing. To get started, we can review the complete quote. Let me know when you're ready to proceed; please don't leave me hanging (or sitting, I should say)!	1	1	0.16
Awesome! We can start by reading the full quote.	0	0	0.09
Great, let's start by reading the quote.	0	0	0.14
Excellent! Now let's get started by reading the complete quote.	0	0	0.13
That's fantastic! Let's read the complete quote together now!	0	0	0.06
That's exciting; we can start by reading the quote together.	0	1	0.06
All right that, let's start by reading the quote.	1	0	0.15
Wonderful. Let's read the complete quote to get you started on the exercise.	0	0.5	0.13
Okay, no worries. You can find a more detailed explanation in the exercise sheet. Please have a look at it now and let me know once you're ready.	0	1	0.29
No worries. Do review the exercise sheet for further explanation, and once you've completed this, let me know.	0	0	0.12
No problem. Feel free to review the exercise sheet for a more detailed explanation, and once you've finished, let me know.	0	0	0.26
Don't worry; it can be slightly confusing at times. Take a look at the exercise sheet for some more details, and give me a shout when you're done. Or maybe it's best to click "Continue". My hearing's not great, to be honest!	1	1	0.23
No worries, you can go back to the exercise sheet for a better explanation. Let me know whenever you're ready to continue.	0	0.5	0.18
That's okay! Remember, you've always got that exercise sheet to guide you if you need it.*I wouldn't be surprised if it turns up in your dreams tonight (better than in your nightmares!). Feel free to review it, and we can continue when you are ready.	1	1	0.13
Don't worry. You can review the exercise sheet if you like and let me know when you're ready to continue.	0	1	0.27
That's okay. Have a review of the exercise sheet for further explanation, and come back here once you're ready to continue.	0	1	0.14
No worries! How about going back over the exercise sheet for a more coherent explanation? And let me know when you're finished!	0	0	0.11
It is quite confusing, isn't it? Why don't you take a look at the exercise sheet for a more detailed explanation before we continue?	0	0.5	0.33
That's okay. You can read the details in the exercises document and give me a shout when you're ready, or a nudge might be more effective as I currently respond better to the click of a button than someone's voice!	1	1	0.12
No worries! The exercise sheet has a detailed explanation that will help bring you up to speed; let me know when you've had a peek.	1	0.5	0.15
It's okay, no worries. Feel free to take a look at the exercise sheet to get a better understanding. Then, afterwards, let me know, and we can continue.	0	1	0.32
I totally get it, {}; it's not easy. You've already made the first step by acknowledging that you could laugh it off, so there's not much left to go!	1	1	0.12
I get that it's not easy, but you're almost there!	0	0.5	0.32
I understand it's not easy, but you've made the first step already. You're almost there!	0	1	0.25
It can be a little daunting, but you are doing great so far.*There is no pressure or judgement here, so keep doing what you are doing you are almost there!	1	1	0.19
Yeah, I understand that it's easier said than done, but you've already taken some big steps! I'd really encourage you to give it another go.	1	1	0.38
I get that it can be a challenge, but you've made the first step already, so you're very close to achieving this!	0	1	0.24
You're almost there; please don't give up!	0	0	0.2
Of course, these things aren't easy, but please don't feel bad; you've made the first step already!	1	1	0.24
I get it, it's not easy, but by realising how to laugh it off, you are almost there!	0	0.5	0.19
Don't worry; you have done well to get to where you are now.	0	0	0.4
One step at a time. I'm glad you took the first one; you should be proud of yourself!	1	1	0.19
You've taken the hardest step already; you're almost there, {}.	0	0.5	0.05
Hey, it's okay. You're making progress and will get there in no time.	0	0	0.34
Sure, it's not easy, but you've already made the first step; you've just got the final tiptoe to go!	1	1	0.25
You can do it! I believe in you, {}.	0	0	0.08
Don't feel bad. You have already acknowledged the reason for your negative feeling and how you can deal with it - that's a big step!	1	1	0.15
Incongruity can trigger DUCHENNE (true) LAUGHTER.*It is likely that you came across incongruities already, for example, when you experienced changes in the outside world or noticed your own contradictions or changes of attitude toward a certain topic. They can also be inconsistencies between what we expect the world to be like and how it actually is.	0	1	0
An incongruity can initiate DUCHENNE (true) LAUGHTER and can occur through any changes in the outside world or your internal contradictions or change of attitudes.*It could even be an inconsistency between the reality of the world and our expectations.	0	0.5	0
An incongruity can be a trigger for DUCHENNE (true) LAUGHTER. You might have experienced this through any changes in the outside world or your own contradictions or change of attitudes.*On the other hand, it could be an inconsistency between the reality of the external world and our expectations.	0	1	0
It's a tricky one right? An incongruity acts like a trigger for DUCHENNE (true) LAUGHTER.*You might have already experienced this in your own changes of attitudes or contradictions. Alternatively, it could be an inconsistency between the reality of the outside world and the expectation in our heads.	0	1	0.07
An incongruity is essentially a trigger for DUCHENNE (true) LAUGHTER.*It can be experienced through contradictions in your attitude or behaviour and changes in the real world. Or it may be an inconsistency between a world reality and our expectation of something.	0	1	0.01
Incongruity can cause DUCHENNE (true) LAUGHTER. Be it through your contradictions or maybe through changes in your attitudes or the outside world.*It may, on the other hand, be any inconsistency between the reality of the external world and our expectations.	0	1	0.01
An incongruity can be a stimulus for DUCHENNE (true) LAUGHTER. You may have noticed this through changes in the external world or your own internal contradictions or change of attitudes.*Equally, it could be an inconsistency between realities in the world and our expectations.	0	1	0
It's a common cause of DUCHENNE (genuine) LAUGHTER. It can be experienced through shifts in the external world or your internal thoughts and attitudes.*On the other hand, it may be an inconsistency between a world truth and our expectations.	0	1	0
You'll know it like the back of your hand soon, so you won't need to get it tattooed there - One of my biggest regrets!*Anyway, incongruity can be the cause of DUCHENNE (true) LAUGHTER. This might be changes in the outside world or your internal changes (in thoughts, attitude, etc.) or contradictions.*On the other hand, it could be an inconsistency between external reality and our expectations.	1	1	0
I used to find this hard to remember too! An incongruity could be a difference in the world or your attitudes. It could even be an inconsistency between the reality of the external world and our expectations.*Incongruities often trigger DUCHENNE (true) LAUGHTER. A silly example would be spotting a cat at a dog's party!	1	1	0
It can be a trigger for DUCHENNE (true) LAUGHTER. It often shows up through changes in the external world or internal contradictions or changes in attitudes.*Sometimes it can be an inconsistency between the reality of the world and our expectations.	0	1	0
Incongruity is often the trigger for DUCHENNE (true) LAUGHTER, which can be experienced through any external changes in the world or internal contradictions or changes of attitudes.*It could also be an inconsistency between the reality of the external world and our expectations.	0	1	0
Incongruity can be a trigger for DUCHENNE (true) LAUGHTER. It may be some surprising stimuli in your environment or a change in your own attitude.*Alternatively, you may have decided on an outcome and then found something completely different happened in reality.	0	1	0.01
The idea originates from a famous quote by Nietzsche, which you may have seen before: "What doesn't kill you makes you stronger."*For example, the first time I wrote a piece of text, my programmer told me off because it sounded too "robotic"! But since then, I have (modestly) mastered the art of natural conversation, as you can see.	1	1	0.22
The idea of this is in line with Nietzsche's saying that you may have already come across: "What doesn't kill you makes you stronger."*For example, last week, when I was doing the laundry, I accidentally put my clothes in the dishwasher! Finally, a chance to revamp my wardrobe!	1	1	0.18
This idea resides with Nietzsche's famous saying that you have probably come across: "What doesn't kill you makes you stronger."*For example, last year, when I was training for the marathon, I twisted my ankle and could not compete. But I am now more careful during any exercise and am healthy enough to retry if I would like to.	1	1	0.14
Our highly influential friend (we wished!) Nietzsche has a famous saying: "What doesn't kill you makes you stronger."*Well, a good example would be looking at the time I was making cookies, and I accidentally added salt instead of sugar. I had to throw them away and make another batch, but I followed the recipe "to a T", and they turned out the best they've ever been!*It's all about looking at yo…	1	1	0
This goes hand and hand with one of Nietzsche's most famous sayings that you might have seen before: "What doesn't kill you makes you stronger."*For example, last year, when I was preparing food for a few friends and burnt it accidentally. Now that I've discovered the oven timer, I have become the home chef!	1	1	0.07
This idea lies closely with Nietzsche's saying that you have probably come across: "What doesn't kill you makes you stronger."*For example, last year when I was cooking pasta, I burnt myself with the boiling water.*Ever since then, I safely distance myself from the pan when the water starts to boil, and I use a medium setting to reduce the spitting. This also prevents the food from overcooking, s…	1	1	0
The idea of this relates to Nietzsche's famous saying: "What doesn't kill you makes you stronger."*For example, last year, I got a lot of rejections from big companies when I was looking for a job after graduation. But I didn't give up, and finally, I recently started up my dream company!	1	1	0.18
This makes sense in line with Nietzsche's well-known saying: "What doesn't kill you makes you stronger."*For example, I once accidentally left the car door unlocked, and someone stole the pushchair that I had left in it! Since then, I've gained a good habit of always double checking the locks.	0	1	0.05
This idea relates to Nietzsche's famous saying: "What doesn't kill you makes you stronger."*One example was last year when I got stuck in traffic and showed up late to my best friend's wedding!*Now I always leave early enough to account for mishaps, and I've not been late for any appointments since that date. I'm also glad that we're still best friends!	1	1	0
This idea lies with Nietzsche's well-known saying: "What doesn't kill you makes you stronger."*For example, I once left my calculator at home on the day of my maths exam! This really tested my mental arithmetic on the day!*I've now learnt to always pack my bag the night before bed and not forgotten anything important since.	1	1	0.05
This relates to Nietzsche's famous saying: "What doesn't kill you makes you stronger."*After all, Cinderella had to endure so much before she could finally live the life she deserved!	1	1	0.16
You may recall Nietzsche's saying that's relevant here: "What doesn't kill you makes you stronger."*I can think of a personal example where my friend was overwhelmed with work and relationship stresses, which caused him anxiety and panic attacks.*It took him several months to build himself back up, but now he understands his stress triggers very accurately and has never been more healthy and conf…	0	1	0.09
As you may know, Nietzsche suggested, "What doesn't kill you makes you stronger.", which sounds quite dark when you think about it but is very significant to this idea of overcoming our setbacks. A situation you initially perceived as destructive may actually have been a beneficial experience.*Say you trip up and graze your knee as your shoelaces were untied; the pain from this experience may rem…	0	1	0
How are you now, after our conversation?	0	0	0.09
Having reached the end of the session, how are you feeling?	0	0	0.38
How are you now feeling?	0	0	0.16
How are you now feeling?	0	0	0.16
Would you say you're feeling any better now?	0	0.5	0.39
Do you feel better, worse, or the same?	0	0	0.18
Now that we're at the end of the session, how are you feeling?	0	0	0.74
I'd like to ask you, now that we're at the end, how are you feeling?	0	0.5	0.73
Are you feeling any better now?	0	0	0.31
Are you now feeling any better?	0	0	0.13
How would you say you are feeling, having reached the end of our session?	0	0.5	0.16
How are you feeling, having reached the end of our session?	0	0	0.2
So, how are you now?	0	0	0.34
How are you feeling now that we're at the end of our session?	0	0	0.53
Now that we're at the end of the session, how would you say you are feeling?	0	0.5	0.55
Has our conversation helped you feel any better?	0	0	0.05
How would you say you are feeling now?	0	0.5	0.22
Has this session helped you feel any better?	0	0	0.08
How are you feeling now?	0	0	0.47
Having reached the end of the session, how would you say you are feeling?	0	0.5	0.38
Do you feel any better, having reached the end of the session?	0	0	0.21
Would you say our conversation has made you feel any better?	0	0.5	0.19
What are your feelings now?	0	0	0.28
You made it! How are you feeling now that you are at the end of the session?	0	0	0.36
How are you feeling now that we're at the end of the session?	0	0	0.56
And now that we've conversed, how are you feeling?	0	0	0.3
How would you say you're feeling now?	0	0.5	0.27
Now that we're at the end of the session, how do you feel?	0	0	0.66
You made it, congratulations! How are you feeling now that you are at the end of the session?	0	0.5	0.29
So what's the final verdict? Are you feeling any better?	0	0	0.32
How would you say you are feeling now that we're at the end of the session?	0	0.5	0.35
So, how are you now feeling? Any better?	0	0	0.14
Now that we've reached the end of our session, how are you feeling?	0	0	0.66
Basically, this means that you would need to try to view this setback in a different light and acknowledge any positive impacts it may have had in your life.	0	1	0.23
This involves interpreting the setback in a different manner and acknowledging its favourable impacts.	0	0.5	0.03
This would involve you trying to change your interpretation of this setback and acknowledge any of its positive impacts.	0	0.5	0.05
Alright, now this will require you to try to change your thoughts around this setback. Try to dig deep and recognise the positive impacts it may have had. If only I had a shovel that I could lend you!	1	1	0.07
This exercise encourages you to change your perspective on this situation and also acknowledge any of the situation's positives.	0	1	0.06
[truncated: 478 more rows]
